# Supplementary material for: Robust lanthanide metal–organic frameworks with “all-in-one” multifunction: efficient gas adsorption and separation, tunable light emission and luminescence sensing
Source: Royal Society of Chemistry journal article supplement (doi:10.1039/d0tc05707j), 2021-01-01
Supplement: d0tc05707j1.pdf [file d0tc05707j1.pdf]

## Electronic Supplementary Information (ESI)

### Robust Lanthanide Metal–Organic Frameworks with “All-in-One”

### Multifunction: Efficient Gas uptake and Separation, Tunable Light

### Emission and Luminescent Sensing

Bo Li,<sup>\*a</sup> Jian-Peng Dong,<sup>a</sup> Zhe Zhou,<sup>b</sup> Rui Wang,<sup>\*b</sup> Li-Ya Wang,<sup>\*a</sup> and Shuang-Quan Zang<sup>b</sup>

<sup>a</sup>College of Chemistry and Pharmaceutical Engineering, Nanyang Normal University, Nanyang 473061, People’s Republic of China.

<sup>b</sup>College of Chemistry, Zhengzhou University, Zhengzhou 450001, People’s Republic of China.

**Corresponding authors:**

\*(B. Li) E-mail: libony0107@nynu.edu.cn

\*(L. Y. Wang) E-mail: wly@nynu.edu.cn

\*(R. Wang) E-mail: wangruijy@zzu.edu.cn

## Materials and Instrumentations

All of the materials for syntheses were commercially available and used without further purification. All the solvents used were of analytical grade. Powder X-ray diffraction (PXRD) data of the samples were collected on a D/MAX-3D diffractometer with Cu K $\alpha$  radiation ( $\lambda=1.5418 \text{ \AA}$ ) over the  $2\theta$  range of  $3^\circ$ – $50^\circ$  at the scan rate of  $5^\circ \text{ min}^{-1}$  at room temperature. Simulation of the PXRD spectra was carried out with the single-crystal data and diffraction crystal module of the Mercury program available free of charge via <http://www.ccdc.cam.ac.uk/mercury/>. Thermogravimetry analyses (TGA) were performed on a TA Q50 system under a N $_2$  atmosphere (flow rate =  $60 \text{ mL min}^{-1}$ ) in the temperature range  $25$ – $700^\circ \text{C}$  at a heating rate of  $10^\circ \text{C min}^{-1}$ . Elemental analyses of C, H and N for all samples were collected on a Perkin-Elmer 240 analyzer. Inductively coupled plasma (ICP) data were obtained on an ICP-9000(N+M) inductively coupled plasma emission spectrometer. Fourier-transform infrared spectra (FT-IR) were recorded on a Shimadzu IR Tracer-100 by using KBr pellets ( $4000$ – $400 \text{ cm}^{-1}$ ). UV-vis diffuse reflectance spectra were recorded with a Shimadzu UV-2600 UV-vis spectrophotometer. Luminescence spectra and lifetime decays were collected on an Edinburgh FLS980 fluorescence spectrophotometer. Time resolved emission spectra (TRES) of the samples were recorded with an Edinburgh FLS 920 with a pulsed xenon lamp as the light source. Quantum efficiency was measured using the integrating sphere on a FluoroMax-4 spectrophotometer. All photographs were taken with a Canon EOS 80D camera.

## Experimental Section

### Syntheses of $\{[\text{Ln}(\text{L})(\text{H}_2\text{O})] \cdot 4\text{H}_2\text{O}\}_n$ (Ln = Eu, Tb, Gd)

A similar procedure was used to obtain all complexes. For the preparation of **1-Eu**, a solution containing H $_3$ L (0.014 g, 0.05 mmol), Eu(NO $_3$ ) $_3 \cdot 6\text{H}_2\text{O}$  (0.045 g, 0.1 mmol), DMF (3 mL), H $_2\text{O}$  (2 mL) and HNO $_3$  (1M, 0.5 mL) was stirred for 10 min, and then transferred to a Teflon-lined stainless steel vessel. The vessel was sealed and then heated at  $130^\circ \text{C}$  for 72 h, after cooled to room temperature at a rate of  $5^\circ \text{C min}^{-1}$ , the resulting colorless crystals were harvested by filtration, washed with distilled water, and then dried in air to furnish **1-Eu**. Other complexes were synthesized similarly to **1-Eu**, except that Tb, Gd nitrates (Ln(NO $_3$ ) $_3 \cdot 6\text{H}_2\text{O}$  0.1mmol) in place of Eu(III) nitrate.

$\{[\text{Eu}(\text{L})(\text{H}_2\text{O})] \cdot 4\text{H}_2\text{O}\}_n$  (**1-Eu**). Yield: 72.6% (based on H $_3$ L). C $_{14}$ H $_{16}$ EuNO $_{11}$  (Mr = 526.17). Elemental analysis calcd: C 31.93, H 3.07, N 2.66 %. Found: C 32.06, H 3.11, N 2.72 %. IR (KBr pellet,  $\text{cm}^{-1}$ ): 3360 (w), 2359 (w), 1601 (m), 1545 (s), 1459 (m), 1376 (s), 1267 (s), 1036 (m), 870 (m), 832 (m), 773 (s), 704 (m), 602 (w), 530 (w), 472 (m).

$\{[\text{Tb}(\text{L})(\text{H}_2\text{O})] \cdot 4\text{H}_2\text{O}\}_n$  (**1-Tb**). Yield: 69.5% (based on H $_3$ L). C $_{14}$ H $_{16}$ TbNO $_{11}$  (Mr = 533.13). Elemental analysis calcd: C 31.51, H 3.02, N 2.63 %. Found: C 31.57, H 3.13, N 2.68 %. IR (KBr pellet,  $\text{cm}^{-1}$ ): 3349 (w), 2358 (w), 1609 (m), 1551 (s), 1490 (m), 1379 (s), 1269 (s), 1035 (m), 875 (m), 838 (m), 774 (s), 704 (m), 606 (w), 549 (w), 468 (m).

$\{[\text{Gd}(\text{L})(\text{H}_2\text{O})] \cdot 4\text{H}_2\text{O}\}_n$  (**1-Gd**). Yield: 68.7% (based on H $_3$ L). C $_{14}$ H $_{16}$ GdNO $_{11}$  (Mr = 531.57). Elemental analysis calcd: C 31.60, H 3.03, N 2.63 %. Found: C 31.76, H 3.08, N 2.71 %. IR (KBr pellet,  $\text{cm}^{-1}$ ): 3351 (w), 2356 (w), 1608 (m), 1551 (s), 1489 (m), 1381 (s), 1270 (s), 1039 (m), 876 (m), 839 (m), 775 (s), 704 (m), 608 (w), 551 (w), 470 (m).

### Syntheses of doped bimetallic Eu $_x$ Tb $_{1-x}$ MOFs

The synthetic procedure for complex **1-Eu $_x$ Tb $_{1-x}$**  was the same as that for compound **1-Eu** except that a mixture of Eu(NO $_3$ ) $_3 \cdot 6\text{H}_2\text{O}$  and Tb(NO $_3$ ) $_3 \cdot 6\text{H}_2\text{O}$  replaces Eu(NO $_3$ ) $_3 \cdot 6\text{H}_2\text{O}$ . The total molar amount of Eu $^{3+}$  and Tb $^{3+}$  remained unchanged at 0.1 mmol, and differently doped crystals were obtained by adjusting the molar fraction of Eu $^{3+}$  from 1% to 90%. The powder X-ray diffractions (PXRD) proved the isostructural

structures of the doped complexes to **1-Ln**. The contents of  $\text{Eu}^{3+}$  and  $\text{Tb}^{3+}$  in **1-Eu<sub>x</sub>Tb<sub>1-x</sub>** were determined by ICP analysis and provided in Table S5.

### X-Ray crystallography

Single-crystal X-ray diffraction (SCXRD) measurements were performed on a Rigaku XtaLAB Pro diffractometer with  $\text{Cu-K}\alpha$  radiation ( $\lambda = 1.54178 \text{ \AA}$ ) at 200/293 K. The SADABS program was used for absorption correction.<sup>1</sup> All the structures were solved by direct methods and refined by the full-matrix least-squares method on  $F^2$  with SHELXS and SHELXL programs.<sup>2</sup> The hydrogen atoms on ligands were placed in calculated positions and refined using the riding model. The hydrogens attached to water molecules were located from the difference Fourier maps and refined isotropically. The final formula of **1-Ln** was determined by means of single-crystal structure, TGA and elemental analysis. Refinement parameters and crystallographic data are listed in Table S1-S4 (Supporting Information).

### Gas sorption measurements

The gas sorption isotherms were measured by the Micromeritics ASAP 2020 HD88 system by using high-purity gases ( $\text{N}_2$ , 99.9999%;  $\text{C}_2\text{H}_2$ , 99.9%;  $\text{CO}_2$ , 99.999%;  $\text{CH}_4$ , 99.99%). In order to remove all the guest solvents from **1-Eu**, the fresh sample was guest-exchanged with methanol at least 10 times. Then the sample was activated at 393 K for 10 h with high vacuum (the outgas rate was  $5 \text{ mmHg min}^{-1}$ ) to yield the activated material **1-Eu-a** for further gas sorption studies. The samples were maintained at 77 K by immersing the sample tube in a liquid-nitrogen bath, and at other temperatures (273 K and 298 K) by using a circulating water bath. Cycling  $\text{C}_2\text{H}_2/\text{CO}_2$  adsorption experiment of **1-Eu-a** was carried out under 273 and 298 K, and regenerated at 393 K under dynamic vacuum for 30 minutes.

### Calculation of Isothermic Heats of Adsorption

The isothermic heats of adsorption ( $Q_{st}$ ) were calculated using the Clausius-Clapeyron equation based on pure-component isotherms collected at two different temperatures of 273K and 298 K. The  $Q_{st}$  was defined as

$$Q_{st} = -R \left( \frac{\partial \ln P}{\partial \left( \frac{1}{T} \right)} \right)_y$$

Where  $P$  is the pressure,  $T$  is the temperature,  $R$  is the gas constant and  $y$  is the adsorption amount.<sup>3</sup> These calculations are done through the "Heat of Adsorption" function embedded in the software supplied by Micromeritics 3-Flex Surface Characterization Analyzer.

### Fitting of single component adsorption isotherms

The adsorption curves of  $\text{C}_2\text{H}_2$ ,  $\text{CO}_2$ ,  $\text{CH}_4$  and  $\text{N}_2$  at 273/298K were fitted with the dual-site Langmuir-Freundlich (DSLFF) equation<sup>4</sup>:

$$q = q_{m1} \frac{b_1 P^{\left(\frac{1}{t_1}\right)}}{1 + b_1 P^{\left(\frac{1}{t_1}\right)}} + q_{m2} \frac{b_2 P^{\left(\frac{1}{t_2}\right)}}{1 + b_2 P^{\left(\frac{1}{t_2}\right)}}$$

Here,  $q$  is the uptake ( $\text{mmol g}^{-1}$ ),  $P$  is the pressure (kPa),  $q_{m1}$  and  $q_{m2}$  are the saturation uptakes ( $\text{mmol g}^{-1}$ ) for sites 1 and 2,  $b_1$  and  $b_2$  are the affinity coefficients ( $\text{kPa}^{-1}$ ) for sites 1 and 2, and  $t_1$  and  $t_2$  represent the deviations from the ideal homogeneous surface (unit less) for sites 1 and 2. The parameters that were obtained from the fitting of the adsorption isotherms can be found in Tables S1-S2. Figure 4c shows that the DSLFF equation fits the single component adsorption isotherms well. All isotherms were fitted with  $R^2 > 0.999$ .

### IAST calculations

The selectivity  $S_{1/2}$  in a binary mixture of components 1 and 2 is defined as

$$S_{ads} = \frac{x_1/x_2}{y_1/y_2}$$

where the  $x_1$  represent the molar loadings of component 1 that is in equilibrium with a bulk gas phase with partial pressures  $y_1$  in the mixture. We calculate the values of  $x_1$  and  $x_2$  using the Ideal Adsorbed Solution Theory (IAST) of Myers and Prausnitz.<sup>5</sup>

### Dynamic Gas Breakthrough Experiments

The breakthrough experiments were conducted at ambient conditions (1 bar, 298 K) by using a laboratory-scale fix-bed reactor (Scheme S1). In a typical experiment, 0.6559 g of **1-Eu** powder was packed into a column (length of adsorption bed: 85 mm; inner diameter of adsorption bed: 6 mm). The sample was activated in-situ under pure helium purging at 393 K for 12 hours prior to the experiment. The temperature was precisely controlled using a temperature controller equipped with a heating tape. The flow of He was then turned off while a gas mixture of 50% C<sub>2</sub>H<sub>2</sub> and 50% CO<sub>2</sub> at 5 mL min<sup>-1</sup> was allowed to flow into the column. The composition of gas came out of the column was monitored using an online mass spectrometer (MS). For the cycling experiment, prior to the each cycle, we regenerated the sample by flushing the adsorption bed with helium gas (20 mL min<sup>-1</sup>) for 60 min at 393 K.

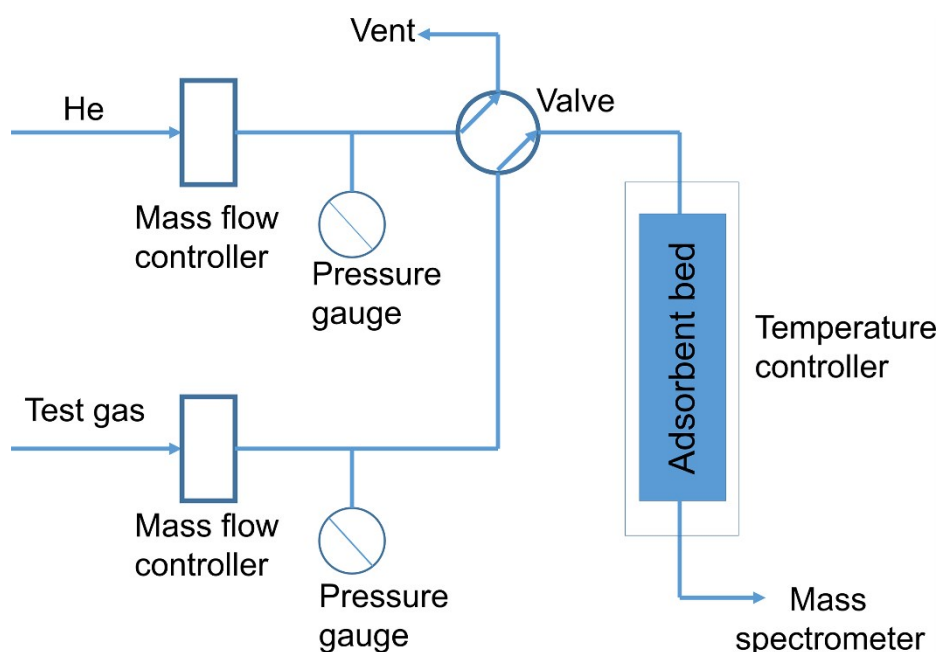

**Scheme S1.** Schematic illustration of the breakthrough experimental setup.

### Calculation method

The present first principle DFT calculations are carried out using the Vienna Ab initio Simulation Package (VASP)<sup>6</sup> with the projector augmented wave (PAW) method.<sup>7</sup> The generalized gradient approximation (GGA) of Perdew-Burke-Ernzerhof (PBE)<sup>8</sup> functional is used to describe the exchange functional. The energy cutoff for the plane wave basis expansion was set to 450 eV and the force on each atom less than 0.03 eV/Å was set for convergence criterion of geometry relaxation. The Brillouin-zone integration was

sampled by single Gamma point. The self-consistent calculations apply a convergence energy threshold of  $10^{-4}$  eV. The DFT-D3 method was employed to consider the van der Waals interaction.<sup>9</sup>

The binding energy was calculated according to:

$$E_{binding} = E_{total} - E_{MOF} - E_{gas}$$

Where  $E_{total}$  is the total energy of the gas molecule adsorbed system,  $E_{MOF}$  and  $E_{gas}$  are the energies of the pure MOF structure and the gas molecule, respectively.

### Luminescence Sensing Experiments

The luminescent sensing experiments for **1-Eu** were completed at room temperature. In particular, 2.0 mg of powder sample was added into 3.0 mL of deionized water of  $M(NO_3)_x$  ( $M = K^+, Na^+, Pb^{2+}, Mn^{2+}, Zn^{2+}, Al^{3+}, Hg^{2+}, Ag^+, Fe^{2+}, Bi^{3+}, Cr^{3+}, Co^{2+}, Ni^{2+}, Cd^{2+}, Ca^{2+}, Cu^{2+}, Mg^{2+},$  and  $Fe^{3+}$ ) and  $KX$  ( $X = PO_4^{3-}, NO_3^-, SCN^-, IO_3^-, Br^-, CO_3^{2-}, H_2PO_4^-, MnO_4^-, SO_3^{2-}, SO_4^{2-}, OH^-, Ac^-, Cl^-, I^-, CrO_4^{2-}, Cr_2O_7^{2-}$ ) at the same concentration (1 mM). Then, the mixtures were ultrasonicated for 10 min to form a suspension, followed by recording of the luminescent spectra under the same conditions.

**Table S1.** Crystal data and structural refinement parameters for **1-Eu**, **1-Tb** and **1-Gd**.

|                                  | <b>1-Eu</b>             | <b>1-Tb</b>             | <b>1-Gd</b>             |
|----------------------------------|-------------------------|-------------------------|-------------------------|
| CCDC number                      | 2005957                 | 2005958                 | 2005959                 |
| Formula                          | $C_{14}H_{16}EuNO_{11}$ | $C_{14}H_{16}TbNO_{11}$ | $C_{14}H_{16}GdNO_{11}$ |
| Formula weight                   | 526.24                  | 533.20                  | 531.53                  |
| $T / K$                          | 200(2)                  | 293(2)                  | 200(2)                  |
| $\lambda / \text{\AA}$           | 1.54178                 | 1.54178                 | 1.54178                 |
| Space group                      | $P4_3$                  | $P4_3$                  | $P4_3$                  |
| Crystal system                   | Tetragonal              | Tetragonal              | Tetragonal              |
| $a / \text{\AA}$                 | 12.35620(10)            | 12.396                  | 12.32110(10)            |
| $b / \text{\AA}$                 | 12.35620(10)            | 12.396                  | 12.32110(10)            |
| $c / \text{\AA}$                 | 14.7154(2)              | 14.60440(10)            | 14.6636(2)              |
| $\alpha / deg$                   | 90                      | 90                      | 90                      |
| $\beta / deg$                    | 90                      | 90                      | 90                      |
| $\gamma / deg$                   | 90                      | 90                      | 90                      |
| $V / \text{\AA}^3$               | 2246.68(5)              | 2244.124(15)            | 2226.07(5)              |
| Z                                | 4                       | 4                       | 4                       |
| $D_{calc}$ (g cm <sup>-3</sup> ) | 1.556                   | 1.578                   | 1.586                   |
| $\mu / mm^{-1}$                  | 20.437                  | 15.950                  | 19.727                  |
| Reflections collected            | 6438                    | 25253                   | 6371                    |
| Independent reflections          | 3522                    | 3981                    | 3498                    |
| $R(int)$                         | 0.0304                  | 0.0305                  | 0.0291                  |
| $F(000)$                         | 1032                    | 1040                    | 1036                    |
| GOF on $F^2$                     | 1.096                   | 1.034                   | 1.048                   |
| $R_1^a [I > 2\sigma(I)]$         | 0.0360                  | 0.0320                  | 0.0347                  |
| $wR_2^b$ (all data)              | 0.1012                  | 0.0949                  | 0.0964                  |

$${}^a R_1 = \Sigma ||F_o| - |F_c| | / \Sigma |F_o|. \quad {}^b wR_2 = [\Sigma w(F_o^2 - F_c^2)^2 / \Sigma w(F_o^2)^2]^{1/2}.$$

**Table S2.** Selected bond lengths (Å) and angles (°) for **1-Eu**.

|                                                                                                                                                 |            |             |            |             |           |
|-------------------------------------------------------------------------------------------------------------------------------------------------|------------|-------------|------------|-------------|-----------|
| Eu1-O1                                                                                                                                          | 2.528(6)   | Eu1-O2      | 2.404(6)   | Eu1-O3A     | 2.310(5)  |
| Eu1-O4B                                                                                                                                         | 2.353(5)   | Eu1-O5C     | 2.568(6)   | Eu1-O6C     | 2.644(6)  |
| Eu1-O6D                                                                                                                                         | 2.480(6)   | Eu1-O1W     | 2.425(6)   | Eu1-N1D     | 2.585(7)  |
| O3A-Eu1-O4B                                                                                                                                     | 142.7(2)   | O3A-Eu1-O2  | 89.7(2)    | O4B-Eu1-O2  | 84.9(2)   |
| O3A-Eu1-O1W                                                                                                                                     | 80.4(2)    | O4B-Eu1-O1W | 77.3(2)    | O2-Eu1-O1W  | 134.1(2)  |
| O3A-Eu1-O6D                                                                                                                                     | 71.91(19)  | O4B-Eu1-O6D | 141.29(19) | O2-Eu1-O6D  | 77.2(2)   |
| O1W-Eu1-O6D                                                                                                                                     | 138.3(2)   | O3A-Eu1-O1  | 70.8(2)    | O4B-Eu1-O1  | 76.7(2)   |
| O2-Eu1-O1                                                                                                                                       | 53.0(2)    | O1W-Eu1-O1  | 81.7(2)    | O6D-Eu1-O1  | 116.1(2)  |
| O3A-Eu1-O5C                                                                                                                                     | 78.00(19)  | O4B-Eu1-O5C | 125.19(19) | O2-Eu1-O5C  | 143.1(2)  |
| O1W-Eu1-O5C                                                                                                                                     | 78.5(2)    | O6D-Eu1-O5C | 65.85(19)  | O1-Eu1-O5C  | 145.3(2)  |
| O3A-Eu1-N1D                                                                                                                                     | 134.9(2)   | O4B-Eu1-N1D | 80.2(2)    | O2-Eu1-N1D  | 79.6(2)   |
| O1W-Eu1-N1D                                                                                                                                     | 136.3(2)   | O6D-Eu1-N1D | 63.06(2)   | O1-Eu1-N1D  | 128.3(2)  |
| O5C-Eu1-N1D                                                                                                                                     | 84.9(2)    | O3A-Eu1-O6D | 123.6(18)  | O4B-Eu1-O6D | 76.03(18) |
| O2-Eu1-O6D                                                                                                                                      | 144.06(19) | O7-Eu1-O6D  | 71.04(18)  | O6C-Eu1-O6D | 99.05(16) |
| O1-Eu1-O6D                                                                                                                                      | 144.9(2)   | O5C-Eu1-O6D | 49.68(17)  | N1D-Eu1-O6D | 67.45(19) |
| Symmetry transformations used to generate equivalent atoms: A: 1-y, 1+x, -0.25+z; B: -x, 1-y, -0.5+z; C: 1-x, 1-y, -0.5+z; D: 1-y, +x, -0.25+z. |            |             |            |             |           |

**Table S3.** Selected bond lengths (Å) and angles (°) for **1-Tb**.

|                                                                                                                                                 |            |             |            |             |            |
|-------------------------------------------------------------------------------------------------------------------------------------------------|------------|-------------|------------|-------------|------------|
| Tb1-O1                                                                                                                                          | 2.364(5)   | Tb1-O2      | 2.516(5)   | Tb1-O3A     | 2.329(4)   |
| Tb1-O4B                                                                                                                                         | 2.289(4)   | Tb1-O5C     | 2.537(5)   | Tb1-O6C     | 2.635(5)   |
| Tb1-O6D                                                                                                                                         | 2.456(5)   | Tb1-O1W     | 2.394(5)   | Tb1-N1D     | 2.570(5)   |
| O4B-Tb1-O3A                                                                                                                                     | 142.86(16) | O4B-Tb1-O1  | 89.86(18)  | O3A-Tb1-O1  | 85.68(17)  |
| O4B-Tb1-O1W                                                                                                                                     | 79.51(17)  | O3A-Tb1-O1W | 77.61(17)  | O1-Tb1-O1W  | 134.35(17) |
| O4B-Tb1-O6D                                                                                                                                     | 71.53(16)  | O3A-Tb1-O6D | 141.82(16) | O1-Tb1-O6D  | 76.73(17)  |
| O1W-Tb1-O6D                                                                                                                                     | 137.60(17) | O4B-Tb1-O2  | 71.22(17)  | O3A-Tb1-O2  | 76.76(16)  |
| O1-Tb1-O2                                                                                                                                       | 53.17(16)  | O1W-Tb1-O2  | 81.56(17)  | O6D-Tb1-O2  | 115.87(16) |
| O4B-Tb1-O5C                                                                                                                                     | 77.49(16)  | O3A-Tb1-O5C | 125.07(16) | O1-Tb1-O5C  | 142.47(18) |
| O1W-Tb1-O5C                                                                                                                                     | 78.38(19)  | O6D-Tb1-O5C | 65.76(16)  | O2-Tb1-O5C  | 145.33(18) |
| O4B-Tb1-N1D                                                                                                                                     | 134.85(18) | O3A-Tb1-N1D | 80.41(17)  | O1-Tb1-N1D  | 79.43(17)  |
| O1W-Tb1-N1D                                                                                                                                     | 136.97(18) | O6C-Tb1-N1D | 63.32(16)  | O2-Tb1-N1D  | 128.18(17) |
| O5C-Tb1-N1D                                                                                                                                     | 84.86(18)  | O4B-Tb1-O6C | 123.28(16) | O3A-Tb1-O6C | 75.64(14)  |
| O1-Tb1-O6C                                                                                                                                      | 144.70(16) | O1W-Tb1-O6C | 71.38(16)  | O6D-Tb1-O6C | 99.43(13)  |
| O2-Tb1-O6C                                                                                                                                      | 144.70(16) | O5C-Tb1-O6C | 49.96(14)  | N1D-Tb1-O6C | 67.53(16)  |
| Symmetry transformations used to generate equivalent atoms: A: 1-x, -y, -0.5+z; B: 1-y, +x, -0.25+z; C: 2-x, -y, -0.5+z; D: 1-y, -1+x, -0.25+z. |            |             |            |             |            |

**Table S4.** Selected bond lengths (Å) and angles (°) for **1-Gd**.

|             |            |             |            |             |            |
|-------------|------------|-------------|------------|-------------|------------|
| Gd1-O1A     | 2.344(5)   | Gd1-O2B     | 2.300(5)   | Gd1-O3C     | 2.387(6)   |
| Gd1-O4C     | 2.522(6)   | Gd1-O5D     | 2.553(6)   | Gd1-O6D     | 2.630(6)   |
| Gd1-O6      | 2.475(6)   | Gd1-O1W     | 2.416(6)   | Gd1-N1      | 2.585(7)   |
| O1A-Gd1-O1W | 77.47(19)  | O1A-Gd1-O2B | 142.6(2)   | O1W-Gd1-O2B | 80.3(19)   |
| O1A-Gd1-O3C | 84.94(19)  | O1W-Gd1-O3C | 133.89(19) | O2B-Gd1-O3C | 89.3(2)    |
| O1A-Gd1-O4C | 76.36(19)  | O1W-Gd1-O4C | 81.33(18)  | O2B-Gd1-O4C | 70.8(2)    |
| O3C-Gd1-O4C | 53.01(19)  | O1A-Gd1-O5D | 125.47(18) | O1W-Gd1-O5D | 78.5(2)    |
| O2B-Gd1-O5D | 77.95(19)  | O3C-Gd1-O5D | 143.0(2)   | O4C-Gd1-O5D | 145.2(2)   |
| O1A-Gd1-O6  | 141.44(19) | O1W-Gd1-O6  | 137.9(2)   | O2B-Gd1-O6  | 71.23(18)  |
| O3C-Gd1-O6  | 77.28(19)  | O4C-Gd1-O6  | 116.35(19) | O5D-Gd1-O6  | 65.75(18)  |
| O1A-Gd1-O6D | 75.77(17)  | O1W-Gd1-O6D | 71.23(18)  | O2B-Gd1-O6D | 124.12(18) |
| O3C-Gd1-O6D | 144.01(19) | O4C-Gd1-O6D | 144.32(18) | O5D-Gd1-O6D | 50.23(17)  |
| O6-Gd1-O6D  | 99.33(16)  | O1A-Gd1-N1  | 80.1(2)    | O1W-Gd1-N1  | 136.6(2)   |
| O2B-Gd1-N1  | 135.0(2)   | O3C-Gd1-N1  | 79.6(2)    | O4C-Gd1-N1  | 128.1(2)   |
| O5D-Gd1-N1  | 85.2(2)    | O6-Gd1-N1   | 63.29(19)  | O6D-Gd1-N1  | 67.48(19)  |

Symmetry transformations used to generate equivalent atoms: A: +y, 2-x, 0.25+z; B: -1+x, +y, +z; C: 1-y, +x, -0.25+z; D: +y, 1-x, 0.25+z.

**Table S5.** The molar ratios of Eu<sup>3+</sup> and Tb<sup>3+</sup> ions and CIE coordinates of doped **1-Eu<sub>x</sub>Tb<sub>1-x</sub>**.

| <b>1-Eu<sub>x</sub>Tb<sub>1-x</sub></b><br><b>(x%)</b> | Eu/Tb (%) ratio<br>used in the<br>reaction | Eu/Tb (%) ratio calculated from ICP |                  | CIE             |
|--------------------------------------------------------|--------------------------------------------|-------------------------------------|------------------|-----------------|
|                                                        |                                            | Eu <sup>3+</sup>                    | Tb <sup>3+</sup> |                 |
| <b>1-Eu<sub>0</sub>Tb<sub>100%</sub></b>               | 0:100                                      | 0                                   | 100              | (0.3316,0.5922) |
| <b>1-Eu<sub>1%</sub>Tb<sub>99%</sub></b>               | 1:99                                       | 1.08                                | 98.92            | (0.3801,0.5510) |
| <b>1-Eu<sub>2%</sub>Tb<sub>98%</sub></b>               | 2:98                                       | 1.96                                | 98.04            | (0.4166,0.5243) |
| <b>1-Eu<sub>3%</sub>Tb<sub>97%</sub></b>               | 3:97                                       | 3.02                                | 96.98            | (0.4463,0.5014) |
| <b>1-Eu<sub>4%</sub>Tb<sub>96%</sub></b>               | 4:96                                       | 4.05                                | 95.95            | (0.4704,0.4848) |
| <b>1-Eu<sub>5%</sub>Tb<sub>95%</sub></b>               | 5:95                                       | 5.13                                | 94.87            | (0.4861,0.4715) |
| <b>1-Eu<sub>6%</sub>Tb<sub>94%</sub></b>               | 6:94                                       | 6.11                                | 93.89            | (0.4968,0.4637) |
| <b>1-Eu<sub>7%</sub>Tb<sub>93%</sub></b>               | 7:93                                       | 7.06                                | 92.94            | (0.5189,0.4452) |
| <b>1-Eu<sub>8%</sub>Tb<sub>92%</sub></b>               | 8:92                                       | 8.10                                | 91.90            | (0.5369,0.4319) |
| <b>1-Eu<sub>9%</sub>Tb<sub>91%</sub></b>               | 9:91                                       | 9.07                                | 90.93            | (0.5590,0.4141) |
| <b>1-Eu<sub>10%</sub>Tb<sub>90%</sub></b>              | 10:90                                      | 10.56                               | 89.44            | (0.5750,0.4015) |
| <b>1-Eu<sub>30%</sub>Tb<sub>70%</sub></b>              | 30:70                                      | 29.74                               | 70.26            | (0.6015,0.3816) |
| <b>1-Eu<sub>50%</sub>Tb<sub>50%</sub></b>              | 50:50                                      | 50.41                               | 49.59            | (0.6391,0.3506) |
| <b>1-Eu<sub>70%</sub>Tb<sub>30%</sub></b>              | 70:30                                      | 69.72                               | 30.28            | (0.6567,0.3377) |
| <b>1-Eu<sub>90%</sub>Tb<sub>10%</sub></b>              | 90:10                                      | 90.55                               | 9.45             | (0.6543,0.3306) |

|                                          |       |     |   |                 |
|------------------------------------------|-------|-----|---|-----------------|
| <b>1-Eu<sub>100%</sub>Tb<sub>0</sub></b> | 100:0 | 100 | 0 | (0.6627,0.3314) |
|------------------------------------------|-------|-----|---|-----------------|

**Table S6** The lifetimes (<sup>5</sup>D<sub>4</sub> of Tb<sup>3+</sup>, <sup>5</sup>D<sub>0</sub> of Eu<sup>3+</sup>) and energy transfer efficiency (η) from Tb<sup>3+</sup> to Eu<sup>3+</sup>

for **1-Eu<sub>x</sub>Tb<sub>1-x</sub>**.

| <b>1-Eu<sub>x</sub>Tb<sub>1-x</sub></b>   | <sup>5</sup> D <sub>4</sub> of Tb <sup>3+</sup> (ms) | <sup>5</sup> D <sub>0</sub> of Eu <sup>3+</sup> (ms) | η     |
|-------------------------------------------|------------------------------------------------------|------------------------------------------------------|-------|
| <b>1-Eu<sub>0</sub>Tb<sub>100%</sub></b>  | 1.039                                                | —                                                    | —     |
| <b>1-Eu<sub>1%</sub>Tb<sub>99%</sub></b>  | 0.854                                                | 1.202                                                | 0.178 |
| <b>1-Eu<sub>2%</sub>Tb<sub>98%</sub></b>  | 0.735                                                | 1.112                                                | 0.293 |
| <b>1-Eu<sub>3%</sub>Tb<sub>97%</sub></b>  | 0.645                                                | 1.093                                                | 0.379 |
| <b>1-Eu<sub>4%</sub>Tb<sub>96%</sub></b>  | 0.589                                                | 0.958                                                | 0.433 |
| <b>1-Eu<sub>5%</sub>Tb<sub>95%</sub></b>  | 0.533                                                | 0.913                                                | 0.487 |
| <b>1-Eu<sub>6%</sub>Tb<sub>96%</sub></b>  | 0.512                                                | 0.857                                                | 0.507 |
| <b>1-Eu<sub>7%</sub>Tb<sub>93%</sub></b>  | 0.492                                                | 0.784                                                | 0.527 |
| <b>1-Eu<sub>8%</sub>Tb<sub>92%</sub></b>  | 0.480                                                | 0.747                                                | 0.538 |
| <b>1-Eu<sub>9%</sub>Tb<sub>91%</sub></b>  | 0.485                                                | 0.701                                                | 0.533 |
| <b>1-Eu<sub>10%</sub>Tb<sub>90%</sub></b> | 0.479                                                | 0.688                                                | 0.539 |
| <b>1-Eu<sub>30%</sub>Tb<sub>70%</sub></b> | 0.453                                                | 0.660                                                | 0.564 |
| <b>1-Eu<sub>50%</sub>Tb<sub>50%</sub></b> | 0.426                                                | 0.623                                                | 0.590 |
| <b>1-Eu<sub>70%</sub>Tb<sub>30%</sub></b> | 0.341                                                | 0.672                                                | 0.672 |
| <b>1-Eu<sub>90%</sub>Tb<sub>10%</sub></b> | 0.257                                                | 0.647                                                | 0.753 |
| <b>1-Eu<sub>100%</sub>Tb<sub>0</sub></b>  | —                                                    | 0.566                                                | —     |



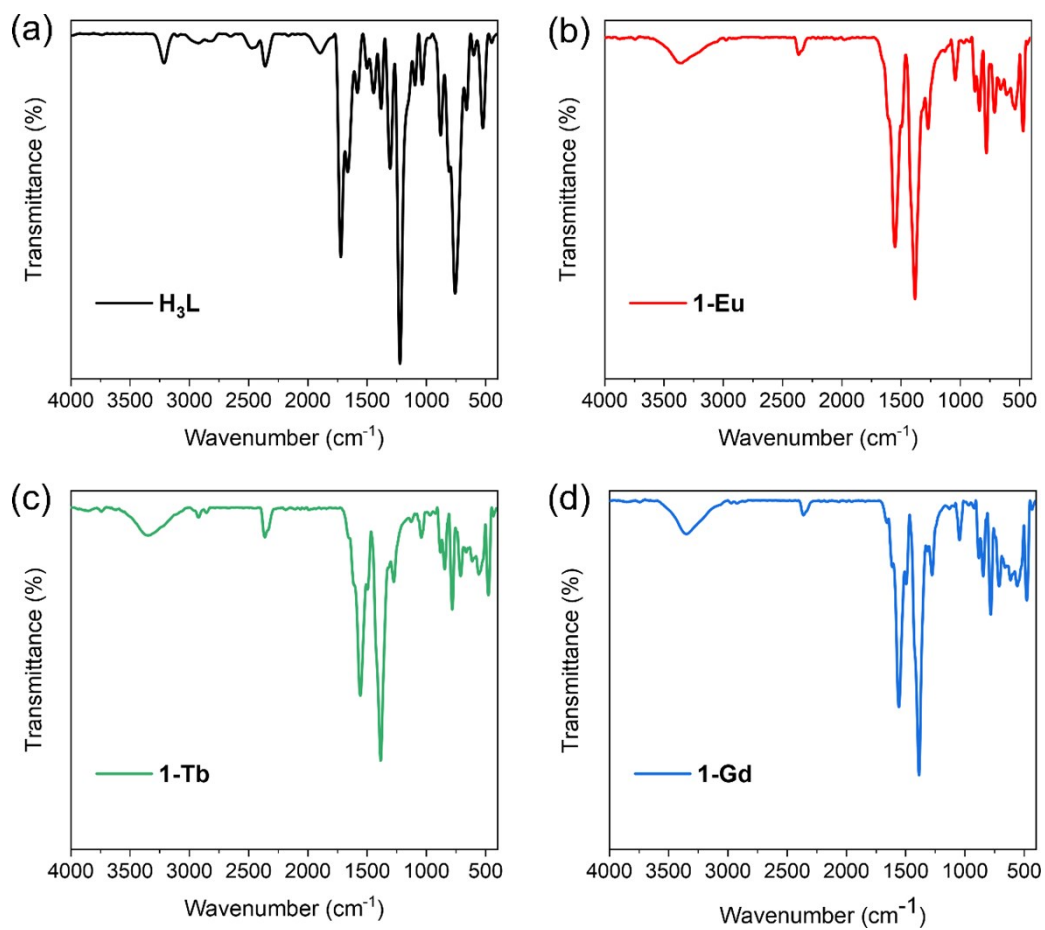

**Fig. S1** The IR spectra: (a) H<sub>3</sub>L; (b) 1-Eu; (c) 1-Tb; (d) 1-Gd.

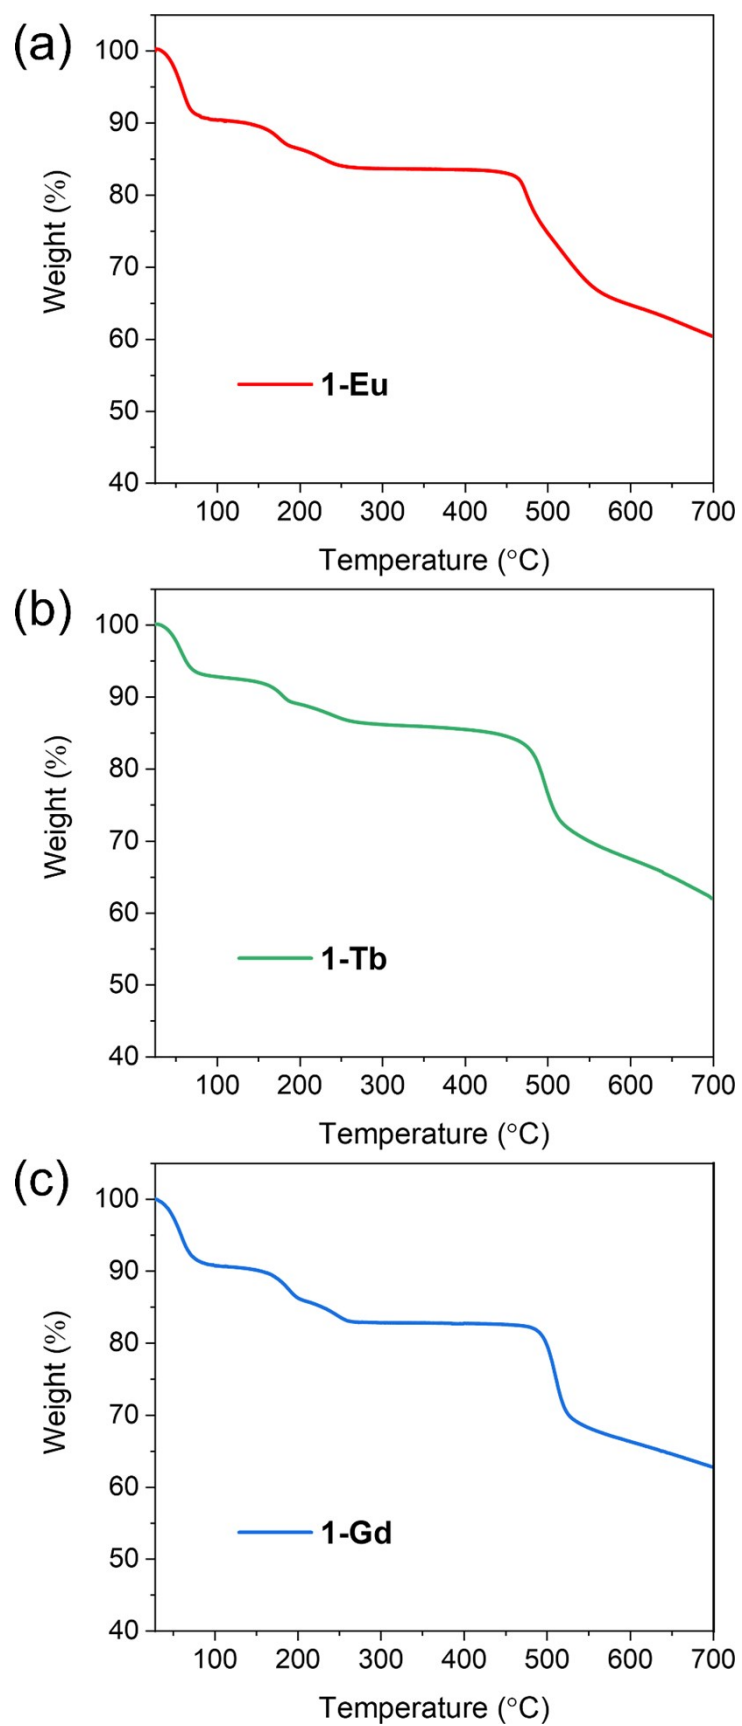

**Fig. S2** Thermogravimetric analysis of **1-Eu** (a), **1-Tb** (b) and **1-Gd** (c).

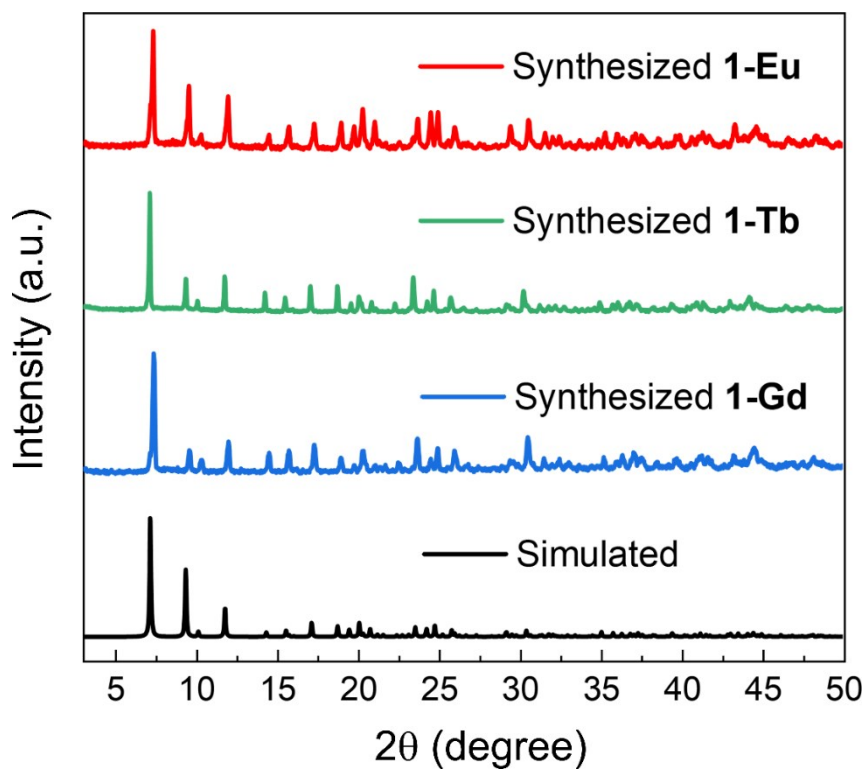

**Fig. S3** PXRD patterns of **1-Eu**, **1-Tb** and **1-Gd**.

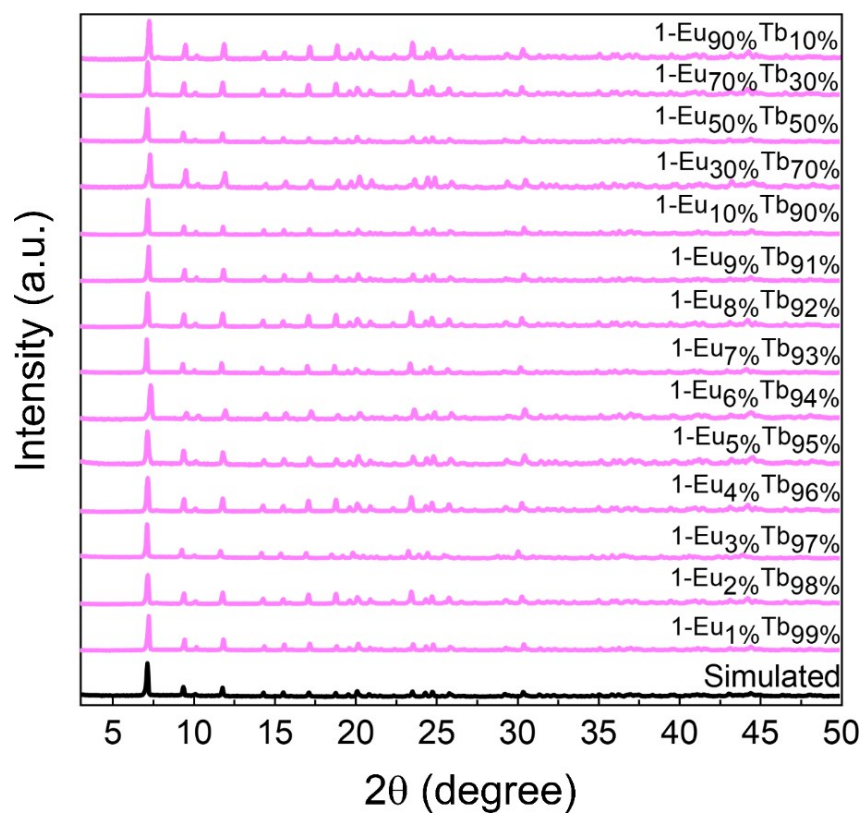

**Fig. S4** PXRD patterns of **1-Eu<sub>x</sub>Tb<sub>1-x</sub>**.

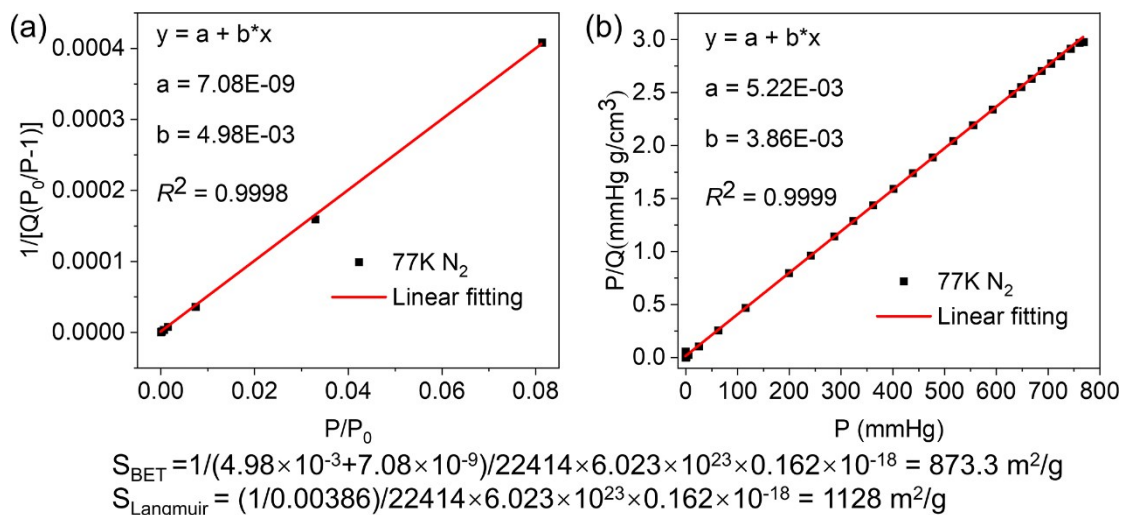

**Fig. S5** BET surface area plot (a), and Langmuir surface area plot (b) for **1-Eu-a**.

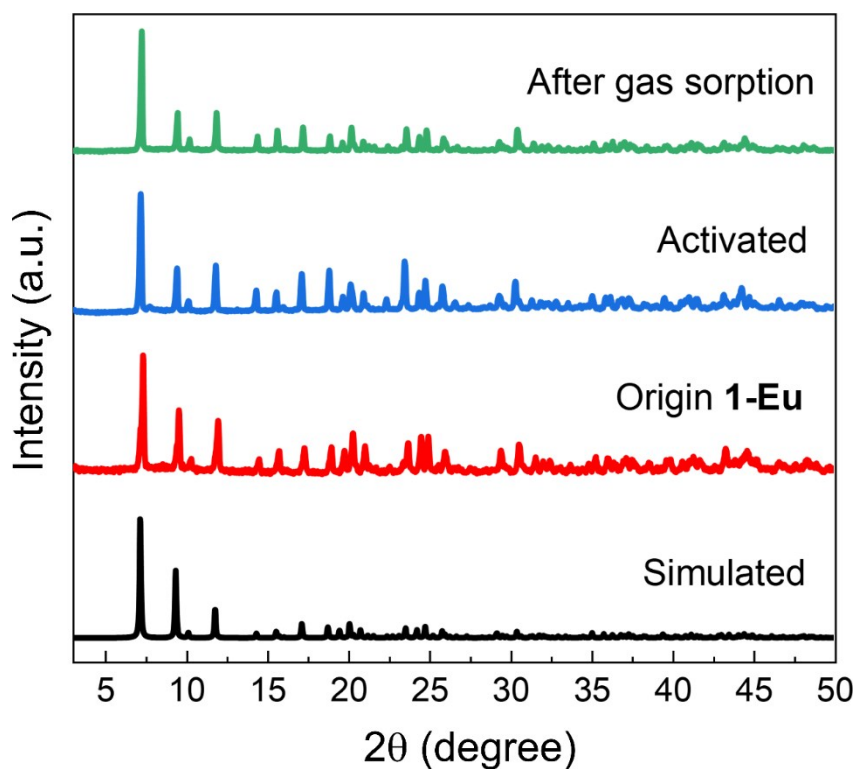

**Fig. S6** PXRD patterns of **1-Eu**, activated **1-Eu** (**1-Eu-a**), and **1-Eu-a** after gas sorption.

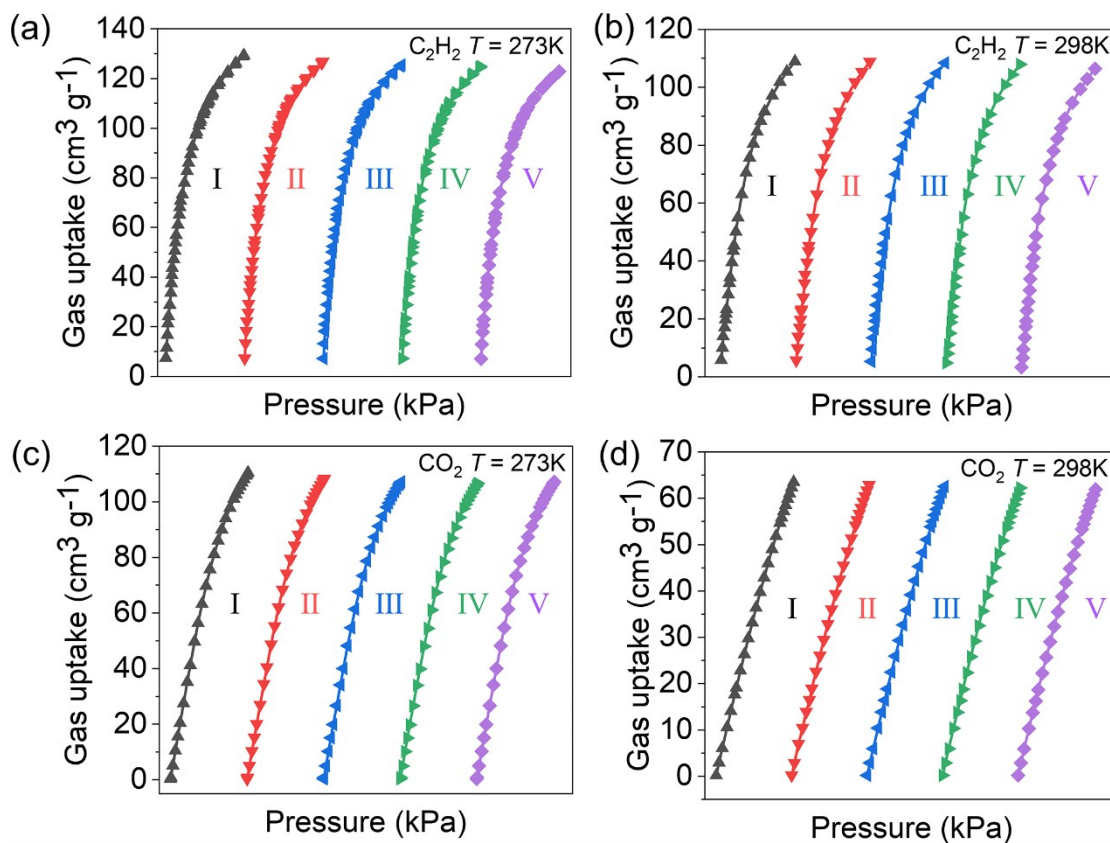

**Fig. S7** (a, b) Repeated C<sub>2</sub>H<sub>2</sub> adsorption isotherm of 5 cycles at 273 and 298K. (c, d) Repeated CO<sub>2</sub> adsorption isotherm of 5 cycles at 273 and 298K.

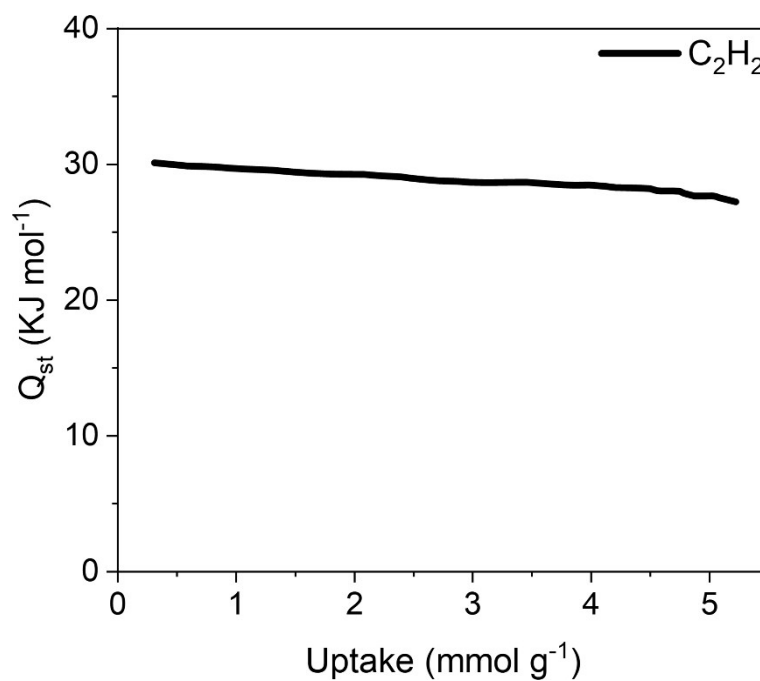

**Fig. S8** The C<sub>2</sub>H<sub>2</sub> adsorption enthalpies of 1-Eu-a.

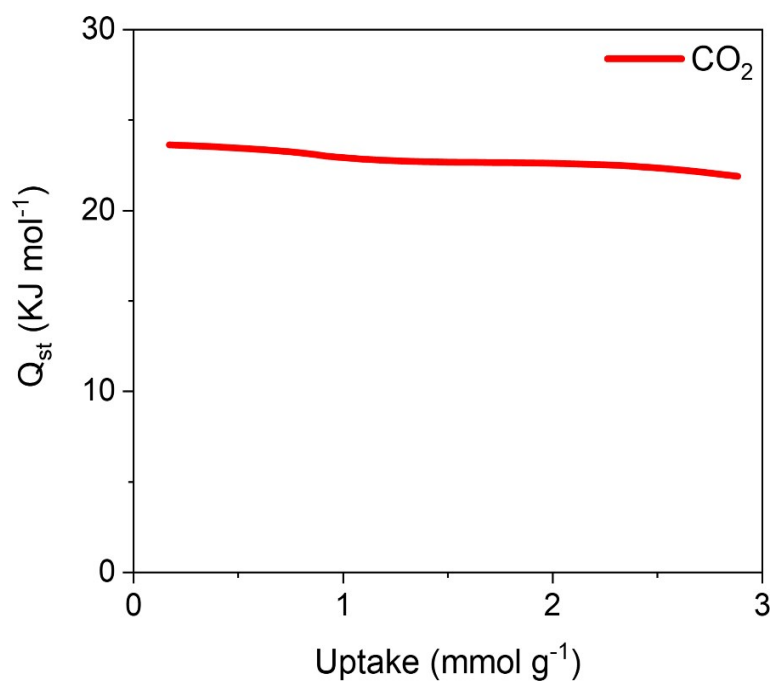

**Fig. S9** The  $\text{CO}_2$  adsorption enthalpies of **1-Eu-a**.

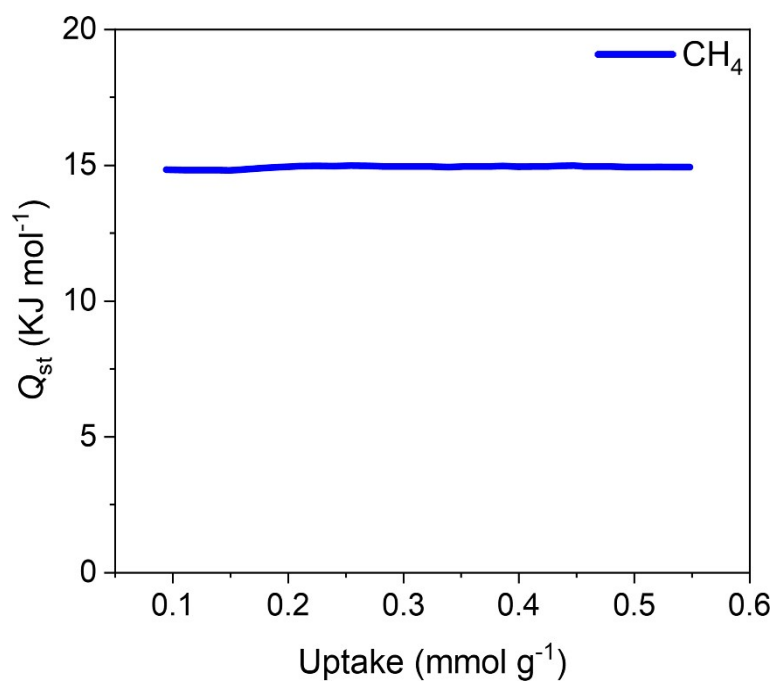

**Fig. S10** The  $\text{CH}_4$  adsorption enthalpies of **1-Eu-a**.

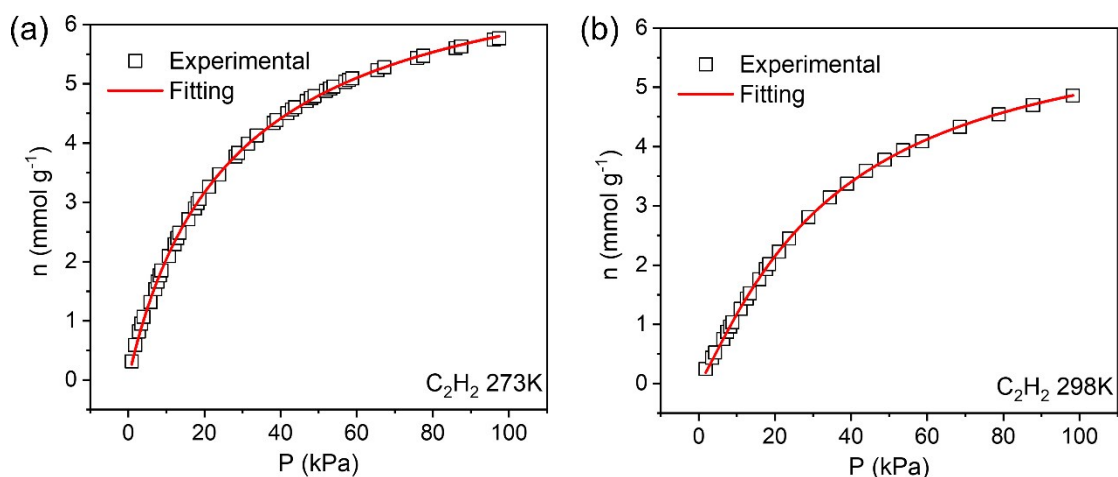

**Fig. S11** DSFL fitting of the  $C_2H_2$  adsorption isotherm of **1-Eu-a** at 273 K and 298K.

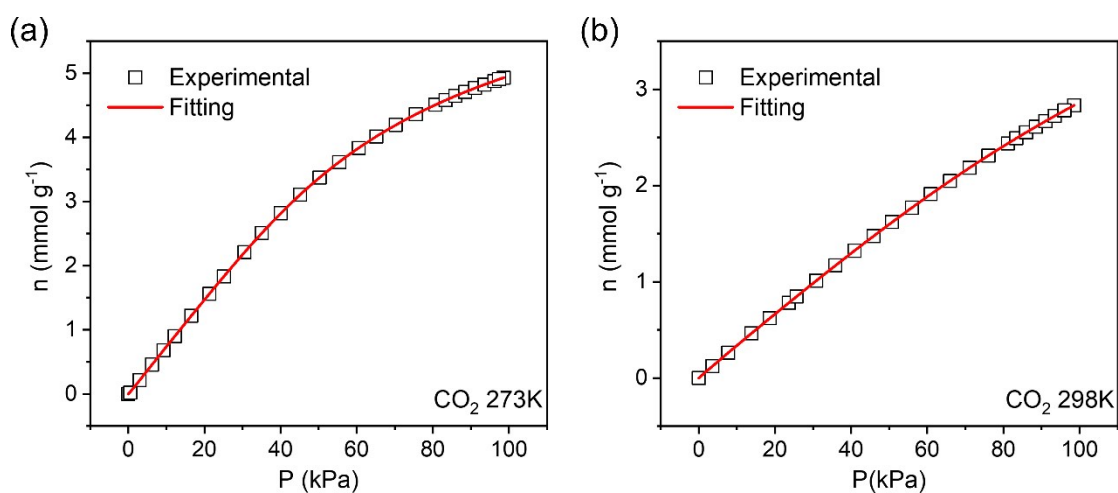

**Fig. S12** DSFL fitting of the  $CO_2$  adsorption isotherm of **1-Eu-a** at 273 K and 298K.

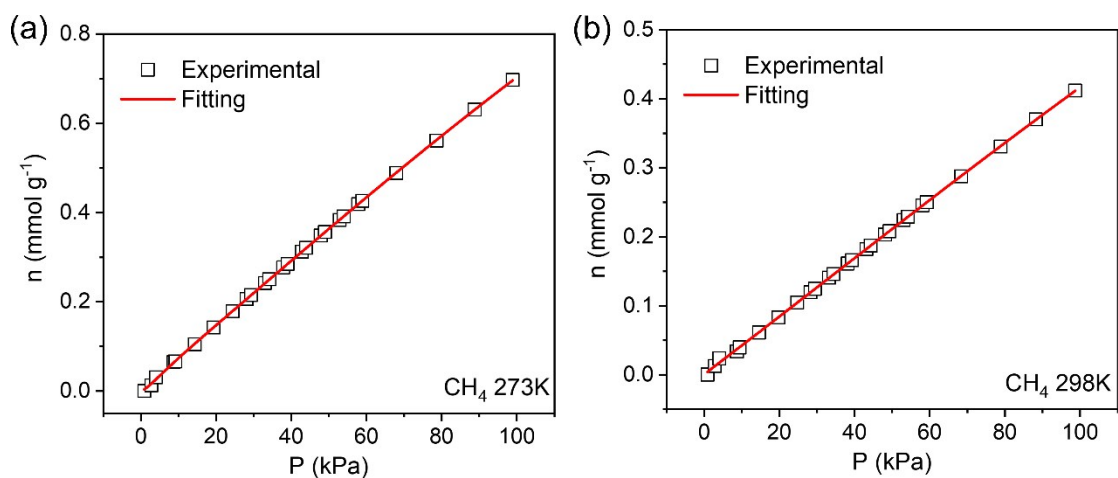

**Fig. S13** DSFL fitting of the  $CH_4$  adsorption isotherm of **1-Eu-a** at 273 K and 298K.

**Table S7.** DSLF parameters from the fitting of C<sub>2</sub>H<sub>2</sub> adsorption isotherms of **1-Eu-a** at 273K and 298 K.

| Parameter                        | 273K    | 298K    |
|----------------------------------|---------|---------|
| $q_{m1}$ (mmol g <sup>-1</sup> ) | 3.77884 | 3.14261 |
| $b_1$ (kPa <sup>-1</sup> )       | 0.04027 | 0.01502 |
| $t_1$                            | 1.03831 | 0.84517 |
| $q_{m2}$ (mmol g <sup>-1</sup> ) | 3.77623 | 3.14172 |
| $b_2$ (kPa <sup>-1</sup> )       | 0.04028 | 0.01502 |
| $t_2$                            | 1.03833 | 0.84519 |
| R <sup>2</sup>                   | 0.9995  | 0.9998  |

**Table S8.** DSLF parameters from the fitting of CO<sub>2</sub> adsorption isotherms of **1-Eu-a** at 273K and 298 K.

| Parameter                        | 273K      | 298K      |
|----------------------------------|-----------|-----------|
| $q_{m1}$ (mmol g <sup>-1</sup> ) | 1.32272   | 1.46671   |
| $b_1$ (kPa <sup>-1</sup> )       | 0.0000488 | 0.0000826 |
| $t_1$                            | 0.38589   | 0.49271   |
| $q_{m2}$ (mmol g <sup>-1</sup> ) | 6.32952   | 5.85186   |
| $b_2$ (kPa <sup>-1</sup> )       | 0.01074   | 0.00594   |
| $t_2$                            | 0.93304   | 1.00505   |
| R <sup>2</sup>                   | 1         | 0.9999    |

**Table S9.** DSLF parameters from the fitting of CH<sub>4</sub> adsorption isotherms of **1-Eu-a** at 273K and 298 K.

| Parameter                        | 273K    | 298K     |
|----------------------------------|---------|----------|
| $q_{m1}$ (mmol g <sup>-1</sup> ) | 3.58178 | 1.05157  |
| $b_1$ (kPa <sup>-1</sup> )       | 0.00103 | 0.000514 |
| $t_1$                            | 0.85182 | 0.76639  |
| $q_{m2}$ (mmol g <sup>-1</sup> ) | 0.03292 | 8.1901   |
| $b_2$ (kPa <sup>-1</sup> )       | 0.02824 | 0.000511 |
| $t_2$                            | 0.58708 | 1.13558  |
| R <sup>2</sup>                   | 0.9999  | 0.9997   |



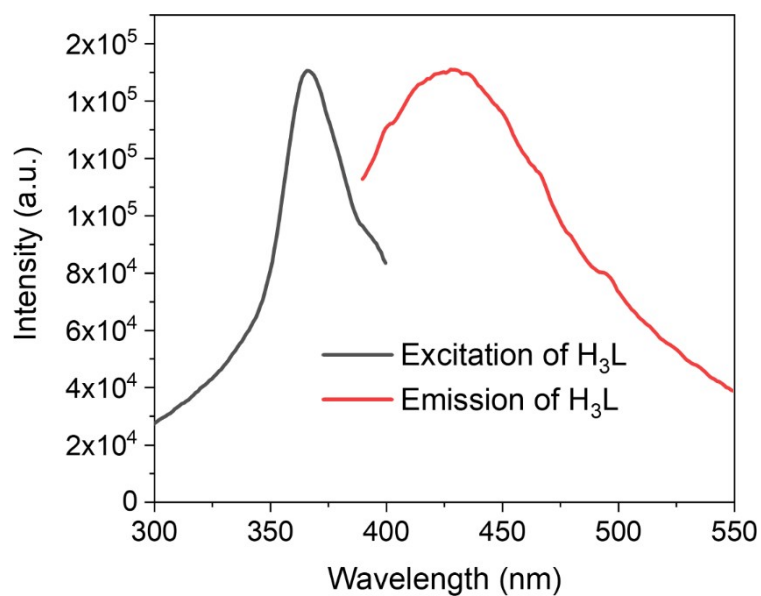

**Fig. S14** Excitation and emission spectra of H<sub>3</sub>L.

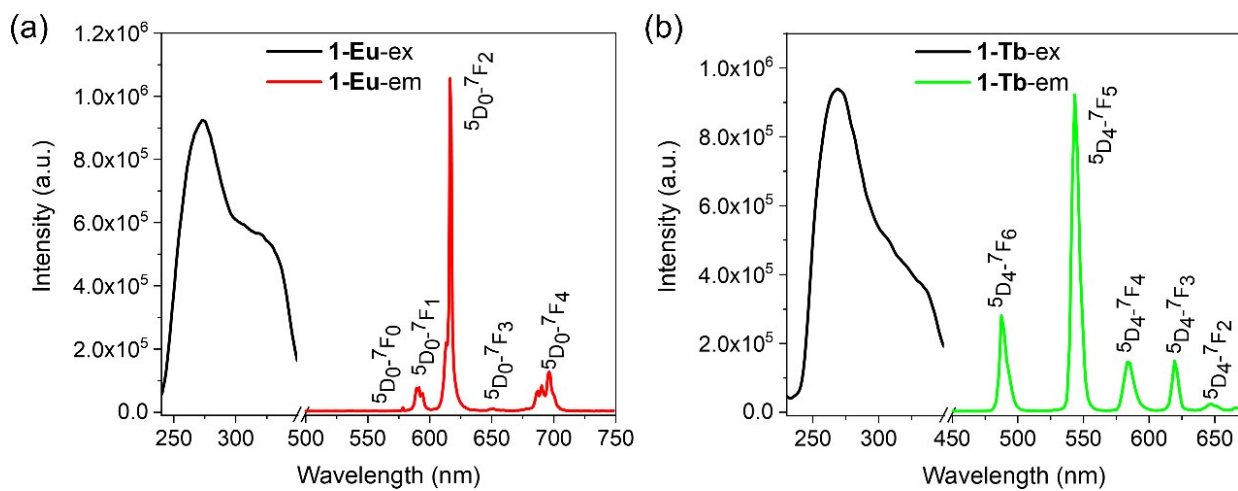

**Fig. S15** Excitation and emission spectra of **1-Eu** (a) and **1-Tb** (b).

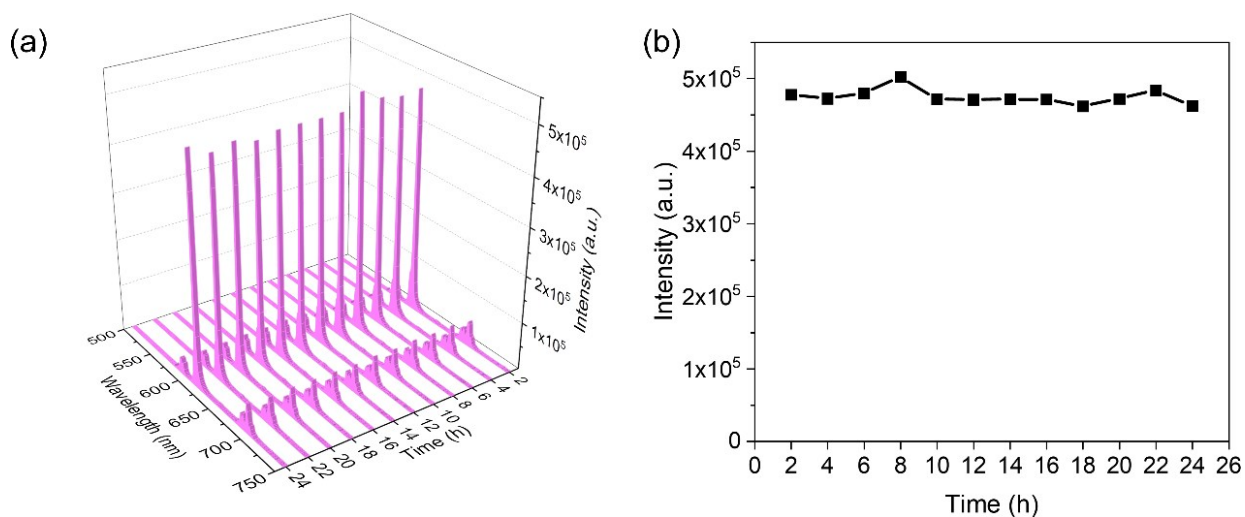

**Fig. S16** Luminescence spectra (a) and emission intensities at 617nm (b) of **1-Eu** after immersion in water for different times.

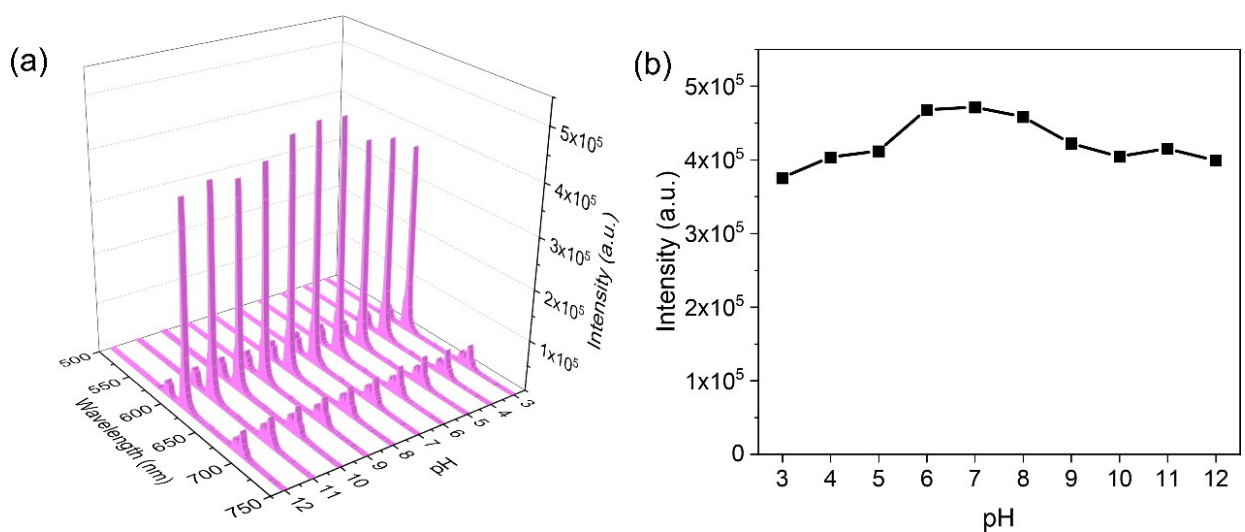

**Fig. S17** The emission spectra (a) and emission intensities at 617nm (b) of **1-Eu** in aqueous solutions with different pH values (3-12).

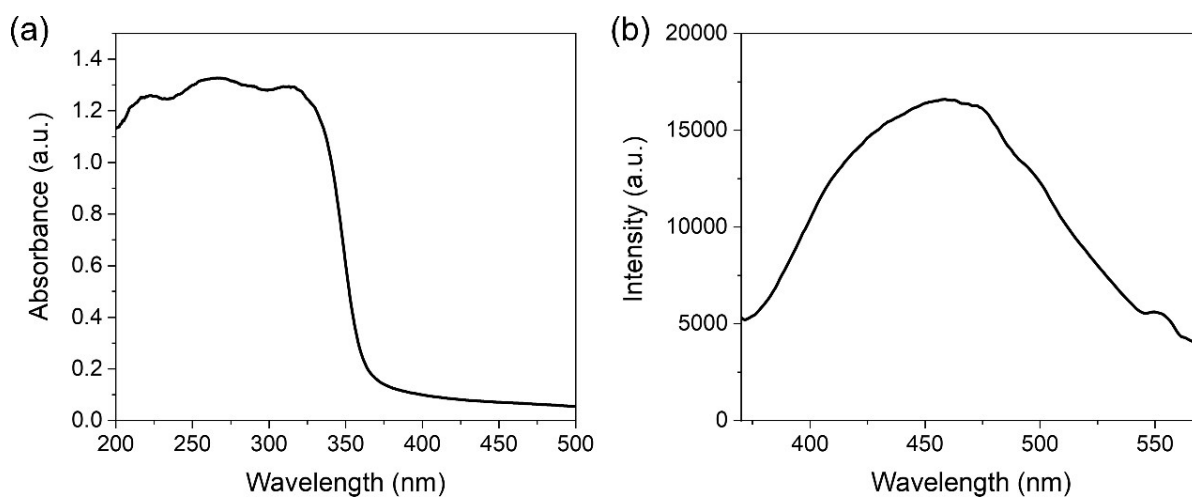

**Fig. S18** (a) UV-vis absorption spectra of ligand H<sub>3</sub>L. (b) The phosphorescence spectrum of **1-Gd** at 77 K.

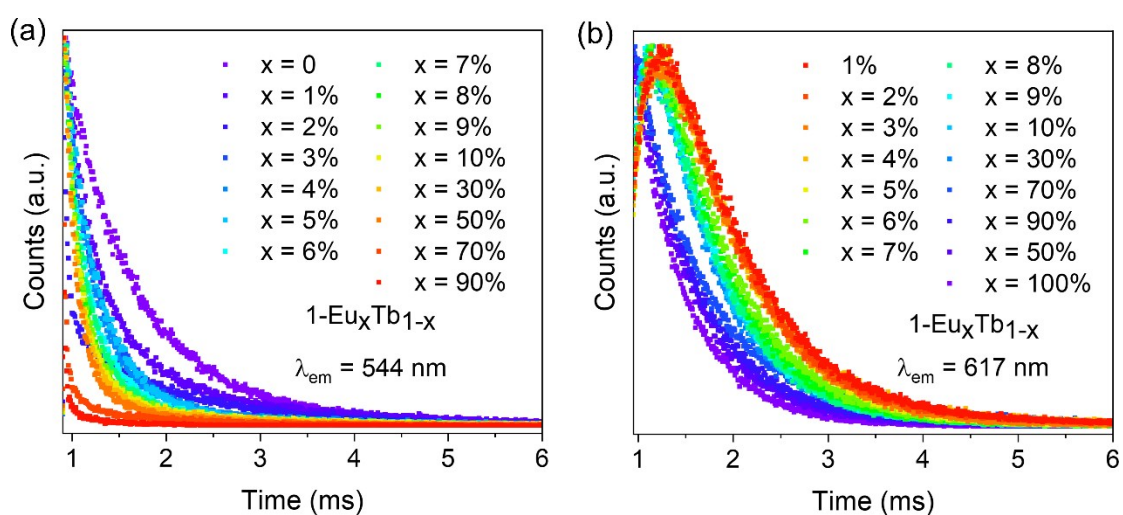

**Fig. S19** Luminescent decay curves of **1-Eu<sub>x</sub>Tb<sub>1-x</sub>**. (a)  $\lambda_{\text{ex}} = 280 \text{ nm}$ ,  $\lambda_{\text{em}} = 544 \text{ nm}$  (b)  $\lambda_{\text{ex}} = 280 \text{ nm}$ ,  $\lambda_{\text{em}} = 617 \text{ nm}$ .

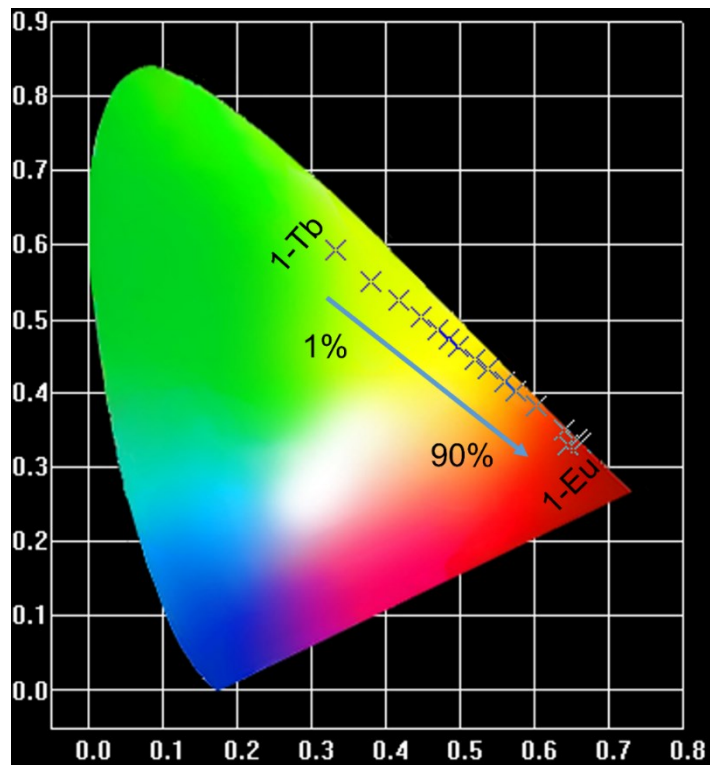

Fig. S20 CIE chromaticity diagram of doped  $1\text{-Eu}_x\text{Tb}_{1-x}$ .

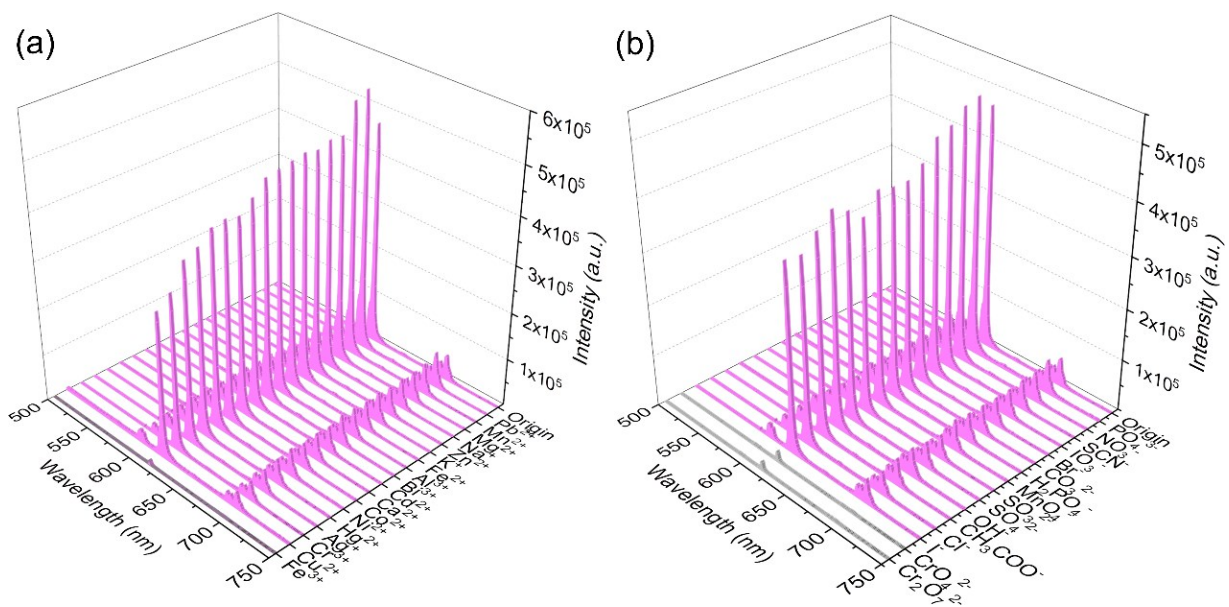

Fig. S21 Emission spectra of  $1\text{-Eu}$  immersed in cation and anion aqueous solutions.

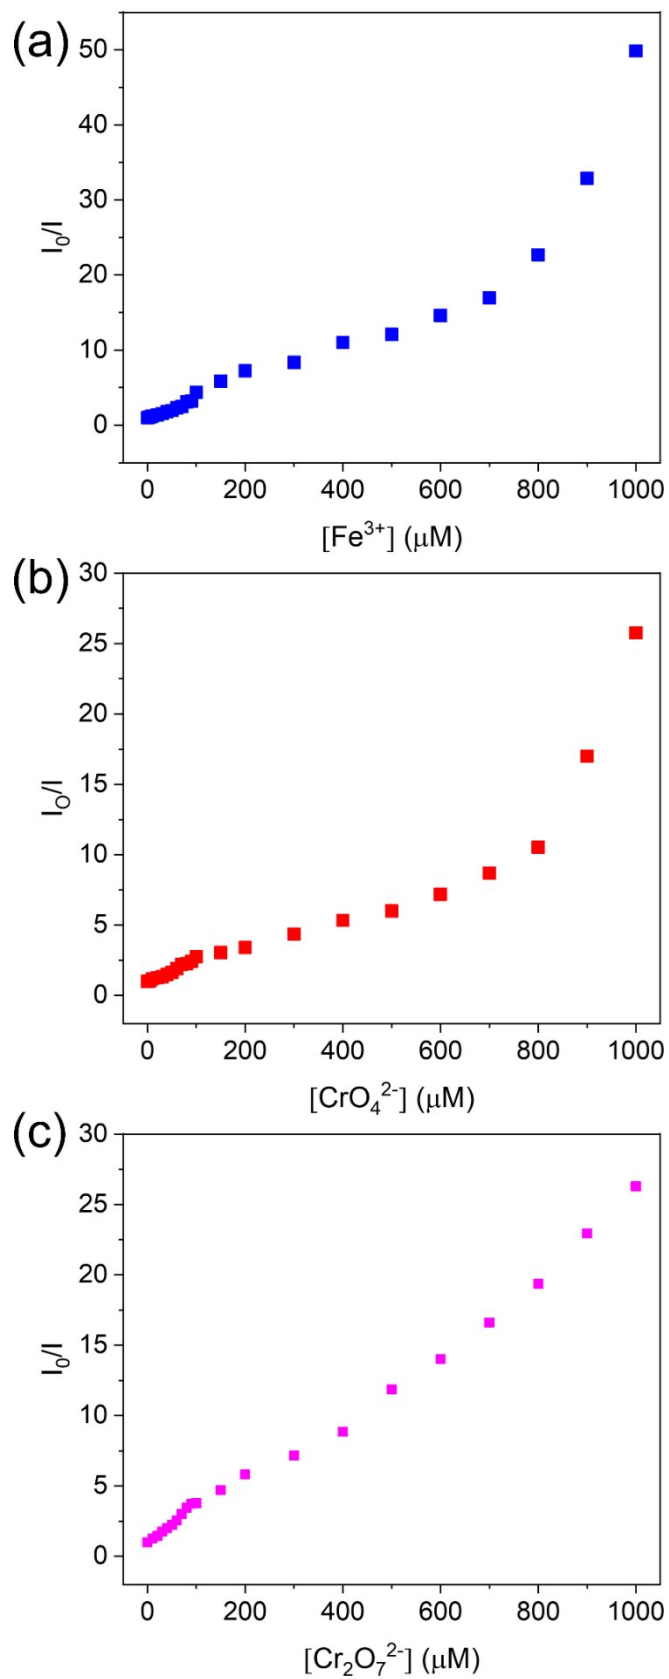

**Fig. S22** Stern–Volmer plots for (a)  $\text{Fe}^{3+}$ , (b)  $\text{CrO}_4^{2-}$  and (c)  $\text{Cr}_2\text{O}_7^{2-}$  in water suspensions of **1-Eu** (0–1000  $\mu\text{M}$ ).

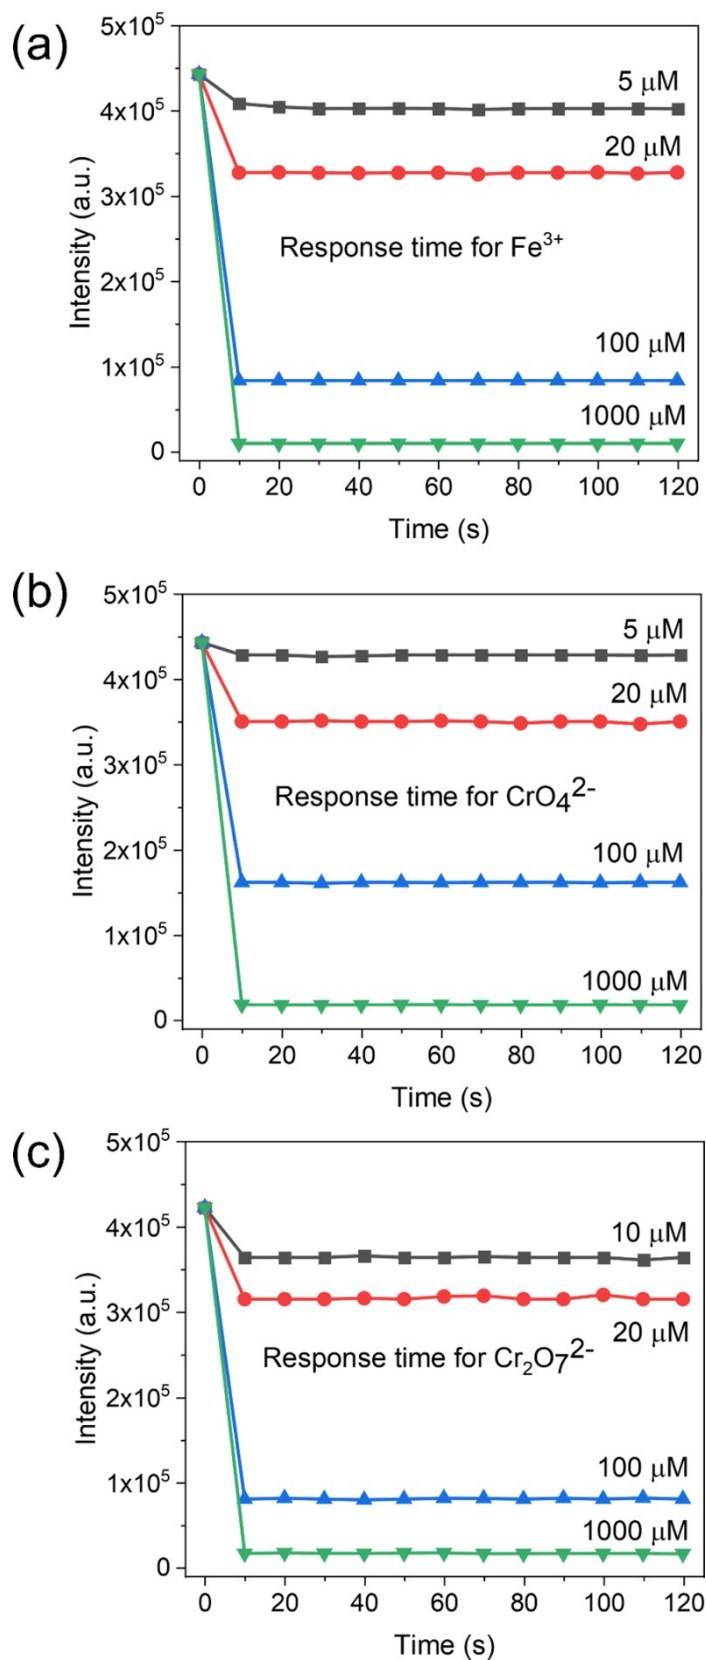

**Fig. S23** Effects of response time on the fluorescent intensities at 617 nm of the aqueous suspension of **1-Eu** in the presence of  $\text{Fe}^{3+}$  (a),  $\text{CrO}_4^{2-}$  (b) and  $\text{Cr}_2\text{O}_7^{2-}$  (c) at different concentrations.

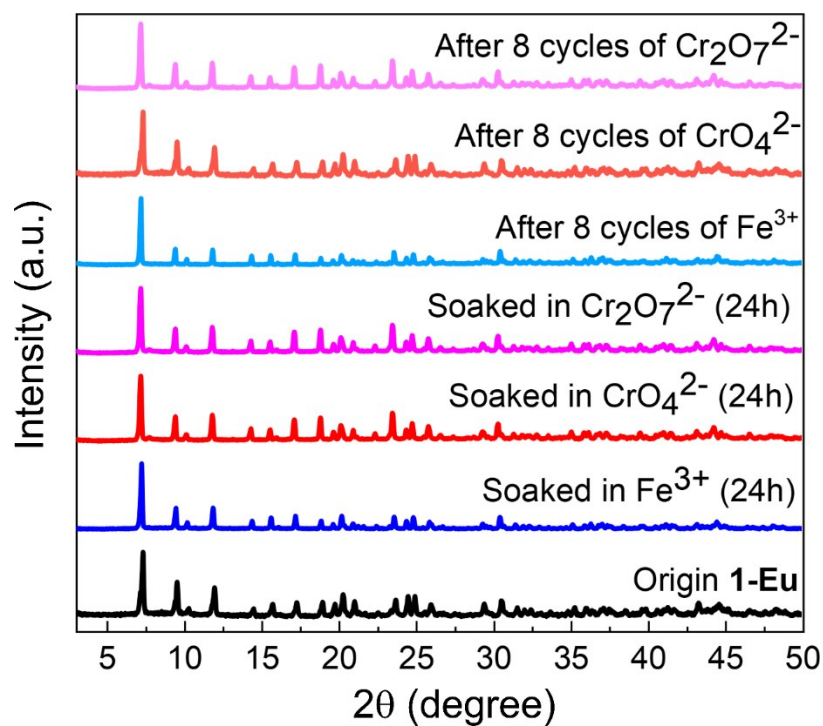

**Fig. S24** The PXRD patterns of **1-Eu** after using eight cycles and soaked in aqueous  $\text{Fe}^{3+}$  and  $\text{CrO}_4^{2-}/\text{Cr}_2\text{O}_7^{2-}$  solution (1 mM) for 24 h.

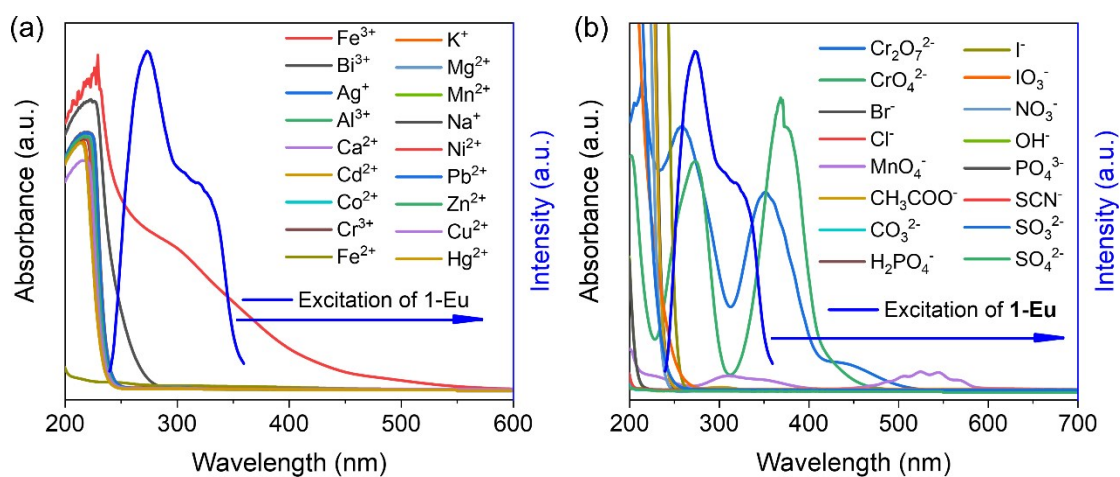

**Fig. S25** The UV-Vis absorption spectrum of aqueous solutions of different testing cations (a), anions (b) and the excitation for **1-Eu**.

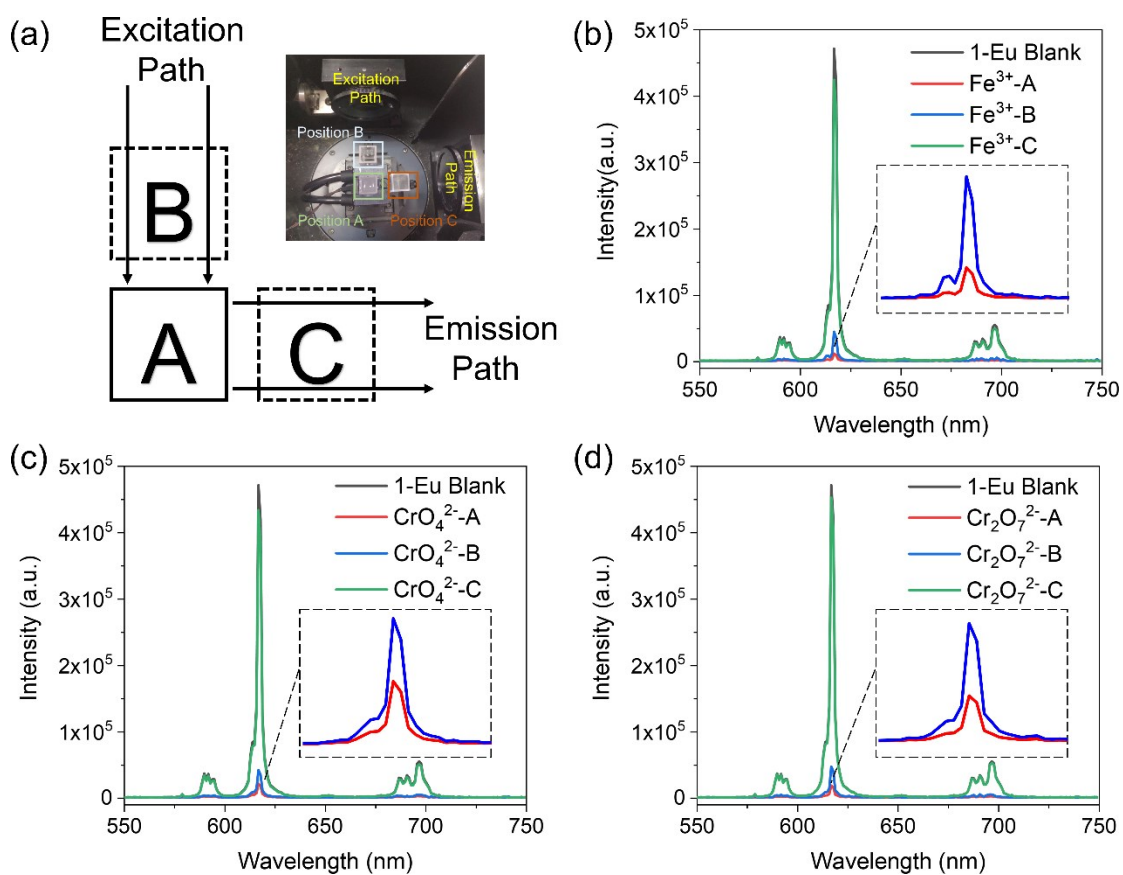

**Fig. S26** (a) Schematic of the luminescent quenching mechanism experiment. The emission spectra of **1-Eu** (excited at 280 nm) with (b) Fe<sup>3+</sup>, (c) CrO<sub>4</sub><sup>2-</sup>, and (d) Cr<sub>2</sub>O<sub>7</sub><sup>2-</sup>. (Black curves, **1-Eu** solely in position A; red curves, mixture of **1-Eu** and Fe<sup>3+</sup> and CrO<sub>4</sub><sup>2-</sup>/Cr<sub>2</sub>O<sub>7</sub><sup>2-</sup> ions in position A; blue curves, **1-Eu** in position A while Fe<sup>3+</sup> and CrO<sub>4</sub><sup>2-</sup>/Cr<sub>2</sub>O<sub>7</sub><sup>2-</sup> ions in position B; green curves, **1-Eu** in position A while Fe<sup>3+</sup> and CrO<sub>4</sub><sup>2-</sup>/Cr<sub>2</sub>O<sub>7</sub><sup>2-</sup> ions in position C.)



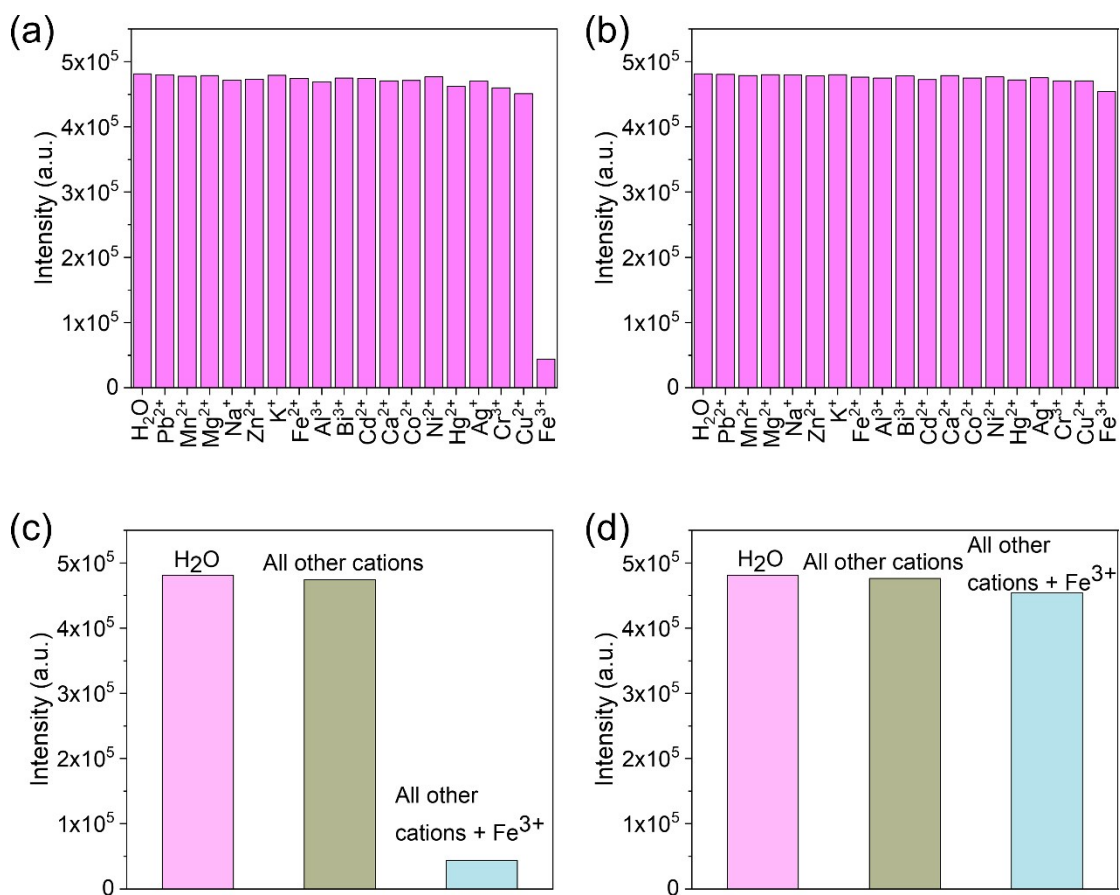

**Fig. S27** The emission intensity of 1-Eu at 617 nm with different testing cations placed in the excitation path (a, c) and emission path (b, d).

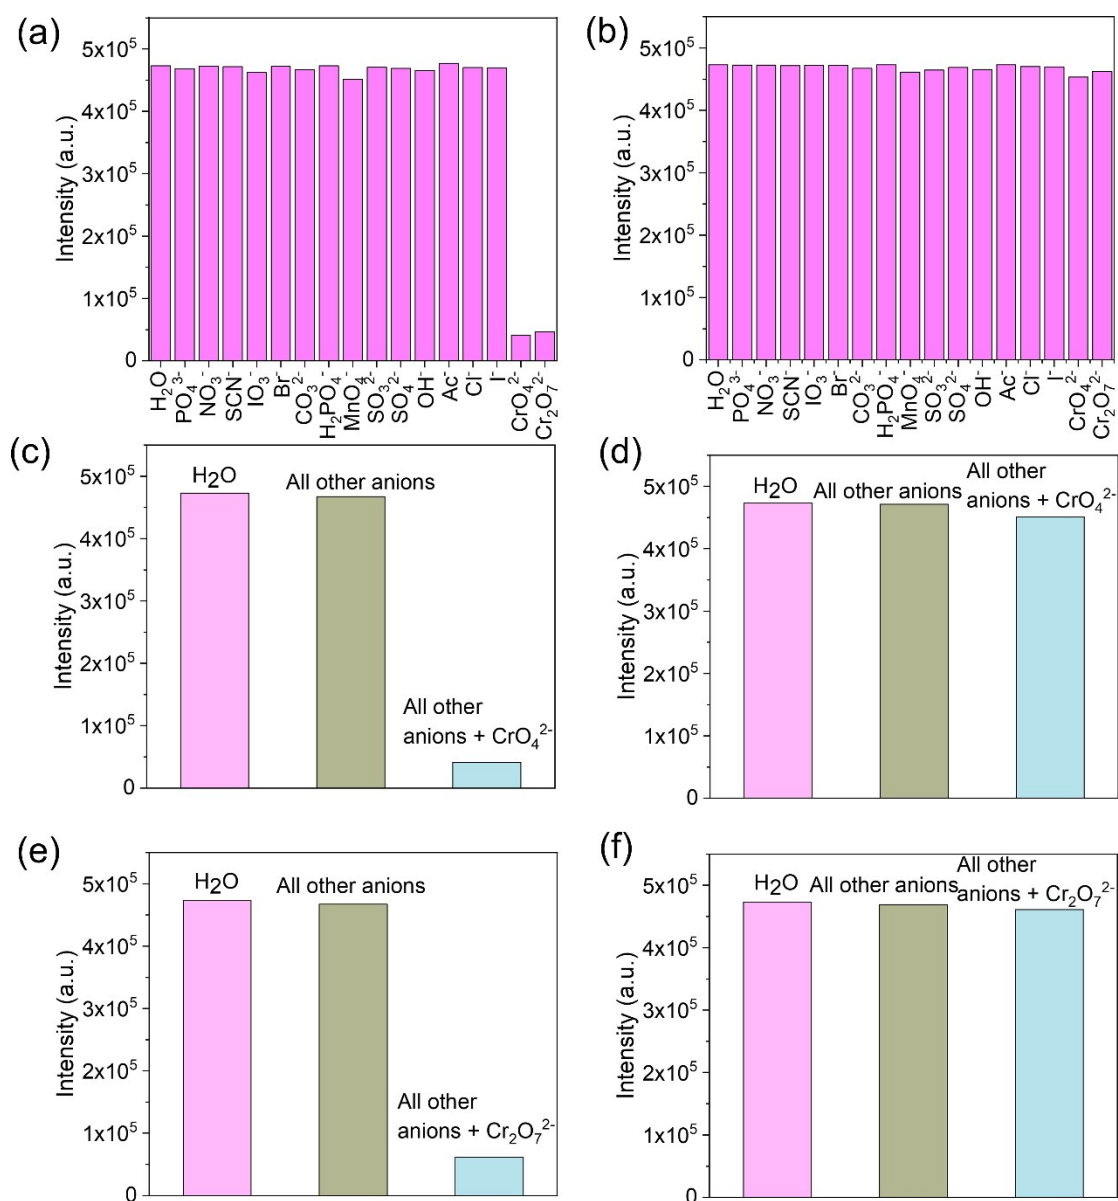

**Fig. S28** The emission intensity of **1-Eu** at 617 nm with different testing anions placed in the excitation path (a, c, e) and emission path (b, d, f).

**Table S10.** A comparison of quenching constants and corresponding LODs for various luminescent MOFs used for detection of  $\text{Fe}^{3+}$ .

| Materials                                                                   | solvent | $K_{sv}(\text{M}^{-1})$ | Detection limit ( $\mu\text{M}$ ) | Reference |
|-----------------------------------------------------------------------------|---------|-------------------------|-----------------------------------|-----------|
| 534-MOF-Tb(L <sub>11</sub> )                                                | water   | $5.51 \times 10^3$      | 130                               | 10        |
| [Cd(NDA)(L)(H <sub>2</sub> O) <sub>2</sub> ] <sub>n</sub>                   | water   | $4.0 \times 10^4$       | 2.06                              | 11        |
| BUT-15                                                                      | water   | $1.66 \times 10^4$      | 0.3                               | 12        |
| [Zn <sub>2</sub> (TPOM)(NDC) <sub>2</sub> ] <sub>3</sub> ·5H <sub>2</sub> O | water   | $1.9 \times 10^4$       | 2                                 | 13        |
| IISERP-MOF25                                                                | water   | $1.52 \times 10^4$      | 12.3                              | 14        |

|                                                                                                                                                        |       |                        |         |                  |
|--------------------------------------------------------------------------------------------------------------------------------------------------------|-------|------------------------|---------|------------------|
| [Eu(L)(H <sub>2</sub> O)]·1.5H <sub>2</sub> O                                                                                                          | water | 6.6 × 10 <sup>4</sup>  | 0.87    | 15               |
| FJI-C8 (Zn)                                                                                                                                            | water | 8.2 × 10 <sup>3</sup>  | 23.3    | 16               |
| {[Cd <sub>2</sub> (bptc)(phen) <sub>2</sub> ·4H <sub>2</sub> O] <sub>n</sub> }                                                                         | water | 3.07 × 10 <sup>3</sup> | 21.7    | 17               |
| Eu <sub>2</sub> (MFDA) <sub>2</sub> (HCOO) <sub>2</sub> (H <sub>2</sub> O) <sub>6</sub>                                                                | DMF   | 1.58 × 10 <sup>3</sup> | 0.3     | 18               |
| MOF-808-Tb                                                                                                                                             | water | 3.12 × 10 <sup>4</sup> | —       | 19               |
| [Ln(L <sub>2</sub> )(H <sub>2</sub> O)(DMF)] <sub>n</sub>                                                                                              | water | 3.10 × 10 <sup>4</sup> | 1.57    | 20               |
| [Eu(O-cpia)(phen)]                                                                                                                                     | water | —                      | 300 ppm | 21               |
| [Zr <sub>6</sub> O <sub>4</sub> (OH) <sub>4</sub> (C <sub>8</sub> H <sub>2</sub> O <sub>4</sub> S <sub>2</sub> ) <sub>6</sub> ]·DMF·18H <sub>2</sub> O | water | 4.41 × 10 <sup>3</sup> | 1.26    | 22               |
| DPYBT                                                                                                                                                  | water | —                      | 3.04    | 23               |
| [Cd <sub>2</sub> Na(L <sub>15</sub> )(BDC) <sub>2.5</sub> ·9H <sub>2</sub> O]                                                                          | DMF   | 1.67 × 10 <sup>4</sup> | 162ppb  | 24               |
| {[Cd(5-asba)(bimb)] <sub>n</sub> }                                                                                                                     | water | 1.78 × 10 <sup>4</sup> | —       | 25               |
| <b>1-Eu</b>                                                                                                                                            | water | 1.88 × 10 <sup>4</sup> | 0.57    | <b>This work</b> |

**Table S11.** A comparison of quenching constants and corresponding LODs for various luminescent MOFs used for detection of CrO<sub>4</sub><sup>2-</sup>/Cr<sub>2</sub>O<sub>7</sub><sup>2-</sup>.

| Materials                                                                                                                                   | Analytes                                                        | solvent | Detection limit (μM) | Reference        |
|---------------------------------------------------------------------------------------------------------------------------------------------|-----------------------------------------------------------------|---------|----------------------|------------------|
| [(CH <sub>3</sub> ) <sub>2</sub> NH <sub>2</sub> ][In(TNB) <sub>4/3</sub> ]·(2DMF)(3H <sub>2</sub> O)                                       | CrO <sub>7</sub> <sup>2-</sup>                                  | water   | 45                   | 26               |
| [Zn <sub>2</sub> (L <sub>1</sub> )(L <sub>2</sub> ) <sub>2</sub> ]·4H <sub>2</sub> O                                                        | CrO <sub>4</sub> <sup>2-</sup> / CrO <sub>7</sub> <sup>2-</sup> | DMF     | 4.8/3.9              | 13               |
| {[Zn <sub>3</sub> (mtrb) <sub>3</sub> (btc) <sub>2</sub> ]·3H <sub>2</sub> O} <sub>n</sub>                                                  | CrO <sub>4</sub> <sup>2-</sup> / CrO <sub>7</sub> <sup>2-</sup> | water   | 4.52/2.83            | 27               |
| [Zn(NH <sub>2</sub> -bdc)(4,4'-bpy)]                                                                                                        | CrO <sub>4</sub> <sup>2-</sup> / CrO <sub>7</sub> <sup>2-</sup> | water   | 2.21/1.3             | 28               |
| [Zn(tpbpc) <sub>2</sub> ]·solvent                                                                                                           | CrO <sub>4</sub> <sup>2-</sup> / CrO <sub>7</sub> <sup>2-</sup> | water   | 0.47 / 0.68          | 29               |
| Zr <sub>6</sub> O <sub>4</sub> (OH) <sub>7</sub> (H <sub>2</sub> O) <sub>3</sub> (btba) <sub>3</sub>                                        | CrO <sub>7</sub> <sup>2-</sup>                                  | water   | 1.57                 | 30               |
| [Zn <sub>3</sub> (bpanth)(oba) <sub>3</sub> ]·2DMF                                                                                          | CrO <sub>4</sub> <sup>2-</sup> / CrO <sub>7</sub> <sup>2-</sup> | water   | 2.67/1.85            | 31               |
| [Eu <sub>7</sub> (mtb) <sub>5</sub> (H <sub>2</sub> O) <sub>16</sub> ](NO <sub>3</sub> )(DMA) <sub>8</sub> (H <sub>2</sub> O) <sub>18</sub> | CrO <sub>4</sub> <sup>2-</sup>                                  | water   | 3.5 nM               | 32               |
| [Cd(TIPA) <sub>2</sub> (ClO <sub>4</sub> ) <sub>2</sub> ](DMF) <sub>3</sub> (H <sub>2</sub> O)                                              | CrO <sub>7</sub> <sup>2-</sup>                                  | water   | 27nM                 | 33               |
| Eu <sup>3+</sup> @MIL-124                                                                                                                   | CrO <sub>7</sub> <sup>2-</sup>                                  | water   | 0.15                 | 34               |
| NU-1000                                                                                                                                     | CrO <sub>7</sub> <sup>2-</sup>                                  | water   | 1.8                  | 35               |
| {[Zn <sub>2</sub> L <sub>2</sub> (H <sub>2</sub> O) <sub>4</sub> ]·H <sub>2</sub> O} <sub>n</sub>                                           | CrO <sub>4</sub> <sup>2-</sup> / CrO <sub>7</sub> <sup>2-</sup> | water   | 2.3 / 2.6            | 36               |
| USTC-5                                                                                                                                      | CrO <sub>4</sub> <sup>2-</sup> / CrO <sub>7</sub> <sup>2-</sup> | water   | 11.4/1.45            | 37               |
| Zn-MOF-1                                                                                                                                    | CrO <sub>4</sub> <sup>2-</sup> / CrO <sub>7</sub> <sup>2-</sup> | water   | 4.8/3.53             | 38               |
| <b>1-Eu</b>                                                                                                                                 | CrO <sub>4</sub> <sup>2-</sup> / CrO <sub>7</sub> <sup>2-</sup> | water   | 0.79/0.42            | <b>This work</b> |

## References

- 1 G. M. Sheldrick, Program for Empirical Absorption Correction of Area Detector Data, University of Göttingen, Germany, 1996.
- 2 G. M. Sheldrick, SHELXS-97, Program for Crystal Structure Solution, Göttingen University, Göttingen, Germany, 1997.
- 3 H. Pan, J. A. Ritter and P. B. Balbuena, *Langmuir*, 1998, **14**, 6323-6327.
- 4 B. Li, Y. Zhang, R. Krishna, K. Yao, Y. Han, Z. Wu, D. Ma, Z. Shi, T. Pham, B. Space, J. Liu, P. K. Thallapally, J. Liu, M. Chrzanowski and S. Ma, *J. Am. Chem. Soc.*, 2014, **136**, 8654–8660.
- 5 A. L. Myers and J. M. Prausnitz, *AIChE J.*, 1965, **11**, 121-127.
- 6 G. Kresse and J. Furthmuller, *Comput. Mater. Sci.*, 1996, **6**, 15-50.
- 7 P. E. Blöchl, *Phys. Rev. B* 1994, **50**, 17953-17979.
- 8 J. P. Perdew, J. A. Chevary, S. H. Vosko, K. A. Jackson, M. R. Pederson, D. J. Singh and C. Fiolhais, *Phys. Rev. B: Condens. Matter Mater. Phys.*, 1992, **46**, 6671-6687.
- 9 S. Grimme, J. Antony, S. Ehrlich and H. Krieg, *J. Chem. Phys.*, 2010, **132**, 154104.
- 10 M. Chen, W. M. Xu, J. Y. Tian, H. Cui, J. X. Zhang, C. S. Liu and M. Du, *J. Mater. Chem. C.*, 2017, **5**, 2015-2021.
- 11 J. F. Zhang, S. M. Ren, H. C. Xia, W. Jia and C. Zhang, *J. Mater. Chem. C*, 2020, **8**, 1427-1432.
- 12 B. Wang, Q. Yang, C. Guo, Y. Sun, L. H. Xie and J. R. Li, *ACS Appl. Mater. Interfaces*, 2017, **9**, 10286-10295.
- 13 R. Lv, J. Y. Wang, Y. P. Zhang, H. Li, L. Y. Yang, S. Y. Liao, W. Gu and X. Liu, *J. Mater. Chem. A*, 2016, **4**, 15494-15500.
- 14 R. Maity, D. Chakraborty, S. Nandi, A. K. Yadav, D. Mullangi, C. P. Vinod and R. Vaidhyanathan, *ACS Appl. Nano Mater*, 2019, **2**, 5169-5178.
- 15 Y. Tao, P. Zhang, J. Liu, X. Chen, X. Guo, H. Jin, J. Chai, L. Wang and Y. Fan, *New. J. Chem.*, 2018, **42**, 19485-19493.
- 16 C. H. Chen, X. S. Wang, L. Li, Y. B. Huang and R. Cao, *Dalton Trans.*, 2018, **47**, 3452-3458.
- 17 Y. Lin, X. Zhang, W. Chen, W. Shi and P. Cheng, *Inorg. Chem.* 2017, **56**, 11768-11778.
- 18 X. H. Zhou, L. Li, H. H. Li, A. Li, T. Yang and W. Huang, *Dalton Trans.* 2013, **42**, 12403-12409.
- 19 J. Zhang, S. B. Peh, J. Wang, Y. H. Du, S. B. Xi, J. Q. Dong, A. Karmakar, Y. P. Ying, Y. X. Wang and D. Zhao, *Chem. Commun.*, 2019, **55**, 4727-4730.
- 20 X. N. Mi, D. F. Sheng and S. N. Wang, *ACS Appl. Mater. Interfaces*, 2019, **11**, 7914-7926.
- 21 Q. S. Wang, J. J. Li, M. N. Zhang and X. Li, *Sens. Actuators, B.*, 2018, **258**, 358-364.
- 22 R. Dalapati, Ü. Kökçam-Demir, C. Janiak and S. Biswas, *Dalton Trans.*, 2018, **47**, 1159-1170.
- 23 J. Qian, N. Huang, Q. Lu, C. Wen and J. Xia, *Sens. Actuators, B*, 2020, **320**, 128377-128386.
- 24 D. Zhao, X. H. Liu, Y. Zhao, P. Wang, Y. Liu, M. Azam, S. Al-Resayes, Y. Lu and W. Y. Sun, *J. Mater. Chem. A*, 2017, **5**, 15797-15807.
- 25 Y. J. Yang, M. J. Wang and K. L. Zhang, *J. Mater. Chem. C.*, 2016, **4**, 11404-11418.
- 26 H. R. Fu, Y. Zhao, T. Xie, M. L. Han, L. F. Ma and S. Q. Zang, *J. Mater. Chem. C.*, 2018, **6**, 6440–6448.

- 27 Y. Q. Zhang, V. A. Blatov, T. R. Zheng, C. H. Yang, L. L. Qian, K. Li, B. L. Li and B. Wu, *Dalton Trans.*, 2018, **47**, 6189–6198.
- 28 T. Wiwasuku, J. Boonmak, K. Siriwong, V. Ervithayasuporn and S. Youngme, *Sens. Actuators, B*, 2019, **284**, 403-413.
- 29 J. Xiao, J. Liu, X. Gao, G. Ji, D. Wang and Z. Liu, *Sens. Actuators, B*, 2018, **269**, 164-172.
- 30 T. He, Y. Z. Zhang, X. J. Kong, J. M. Yu, X. L. Lv, Y. F. Wu, Z. J. Guo and J. R. Li, *ACS Appl. Mater. Interfaces*, 2018, **10**, 16650-16659.
- 31 Z. Q. Yao, G. Y. Li, J. Xu, T. L. Hu and X. H. Bu, *Chem.-Eur. J.*, 2018, **24**, 3192-3198.
- 32 W. Liu, Y. L. Wang, Z. L. Bai, Y. X. Li, Y. X. Wang, L. H. Chen, L. Xu, J. Diwu, Z. F. Chai and S. A. Wang, *ACS Appl. Mater. Interfaces*, 2017, **9**, 16448-16457.
- 33 H. Fu, Y. Zhao, Z. Zhou, X. Yang and L. Ma, *Dalton Trans.*, 2018, **47**, 3725-3732.
- 34 X. Y. Xu and B. Yan, *ACS Appl. Mater. Interfaces*, 2015, **7**, 721-729.
- 35 Z. J. Lin, H. Q. Zheng, H. Y. Zheng, L. P. Lin, Q. Xin and R. Cao, *Inorg. Chem.*, 2017, **56**, 14178-14188.
- 36 C. X. Wang, Y. P. Xia, Z. Q. Yao, J. L. Xu, Z. Chang and X. H. Bu, *Dalton Trans.*, 2019, **48**, 387-394.
- 37 B. Li, Q. Yan and G. Yong, *J. Mater. Chem. C*, 2020, DOI: 10.1039/C9TC07030C.
- 38 X. Y. Guo, F. Zhao, J. J. Liu, Z. L. Liu and Y. Q. Wang, *J. Mater. Chem. A*, 2017, **5**, 20035-20043.
